# Supplementary material
Source: publisher figshare collection journal article supplement (https://acs.figshare.com/ndownloader/files/5790939)

# A Versatile Set of Aminooxy Amino Acids for the Synthesis of Neoglycopeptides

Michael R. Carrasco\* and Ryan T. Brown

## Table of contents

|                                                           |     |
|-----------------------------------------------------------|-----|
| General experimental procedures                           | S2  |
| Figure S1. $^1\text{H}$ NMR spectrum of <b>1b</b>         | S3  |
| Figure S2. $^{13}\text{C}$ NMR spectrum of <b>1b</b>      | S4  |
| Figure S3. $^1\text{H}$ NMR spectrum of <b>2b</b>         | S5  |
| Figure S4. $^{13}\text{C}$ NMR spectrum of <b>2b</b>      | S6  |
| Figure S5. $^1\text{H}$ NMR spectrum of <b>3b</b>         | S7  |
| Figure S6. $^{13}\text{C}$ NMR spectrum of <b>3b</b>      | S8  |
| Figure S7. $^1\text{H}$ NMR spectrum of <b>4b</b>         | S9  |
| Figure S8. $^{13}\text{C}$ NMR spectrum of <b>4b</b>      | S10 |
| Figure S9. $^1\text{H}$ NMR spectrum of <b>5</b>          | S11 |
| Figure S10. $^{13}\text{C}$ NMR spectrum of <b>5</b>      | S12 |
| Figure S11. $^1\text{H}$ NMR spectrum of <b>6</b>         | S13 |
| Figure S12. $^{13}\text{C}$ NMR spectrum of <b>6</b>      | S14 |
| Figure S13. $^1\text{H}$ NMR spectrum of <b>7</b>         | S15 |
| Figure S14. $^{13}\text{C}$ NMR spectrum of <b>7</b>      | S16 |
| Figure S15. $^1\text{H}$ NMR spectrum of <b>8</b>         | S17 |
| Figure S16. $^{13}\text{C}$ NMR spectrum of <b>8</b>      | S18 |
| Figure S17. $^1\text{H}$ NMR spectrum of <b>9</b>         | S19 |
| Figure S18. $^{13}\text{C}$ NMR spectrum of <b>9</b>      | S20 |
| Figure S19. HPLC chromatograms of <b>14</b> and <b>18</b> | S21 |
| Figure S20. HPLC chromatograms of <b>15</b> and <b>19</b> | S22 |
| Figure S21. HPLC chromatograms of <b>16</b> and <b>20</b> | S23 |
| Figure S22. HPLC chromatogram of <b>17</b>                | S24 |

## General experimental procedures.

Unless otherwise noted, all reactions were run at rt and under ambient atmosphere. Chromatographic separations were performed using silica gel (230-400 mesh). Organic solutions were dried with  $\text{Na}_2\text{SO}_4$ , and solvents were removed using standard rotary evaporation under reduced pressure. Products were dried under high vacuum. Commercial reagents were used in all cases without further purification. Spectral characterizations of **1b**, **2b**, and **3b** were performed at elevated temperatures because of the presence of distinct rotational isomers under most conditions.

SPPS was performed using commercial MBHA resin using standard Boc-chemistry-based procedures<sup>10</sup> with the following variations. The amino acids were activated with 2-(1H-benzotriazole-1-yl)-1,1,3,3-tetramethyluronium hexafluorophosphate (HBTU) and  $\text{NEt}(i\text{-Pr})_2$  in DMF. All commercial amino acids were used in a 10-fold excess to the resin loading and allowed to react for 10 min. **1b**, **2b**, **3b** and **4b** were used in a 2 to 3-fold excess and allowed to react for 25 min. Boc deprotections were carried out using neat TFA. Resin washings between steps were performed with a continuous flow of DMF for 1 min. Final deprotection and resin cleavage was accomplished by treatment with liquid HF or bromotrimethylsilane:TFA:thioanisole (v:v:v, 0.6:3:0.8).

**Figure S1.**  $^1\text{H}$  NMR spectrum of **1b** (400 MHz,  $\text{CDCl}_3$ , 55  $^\circ\text{C}$ ).

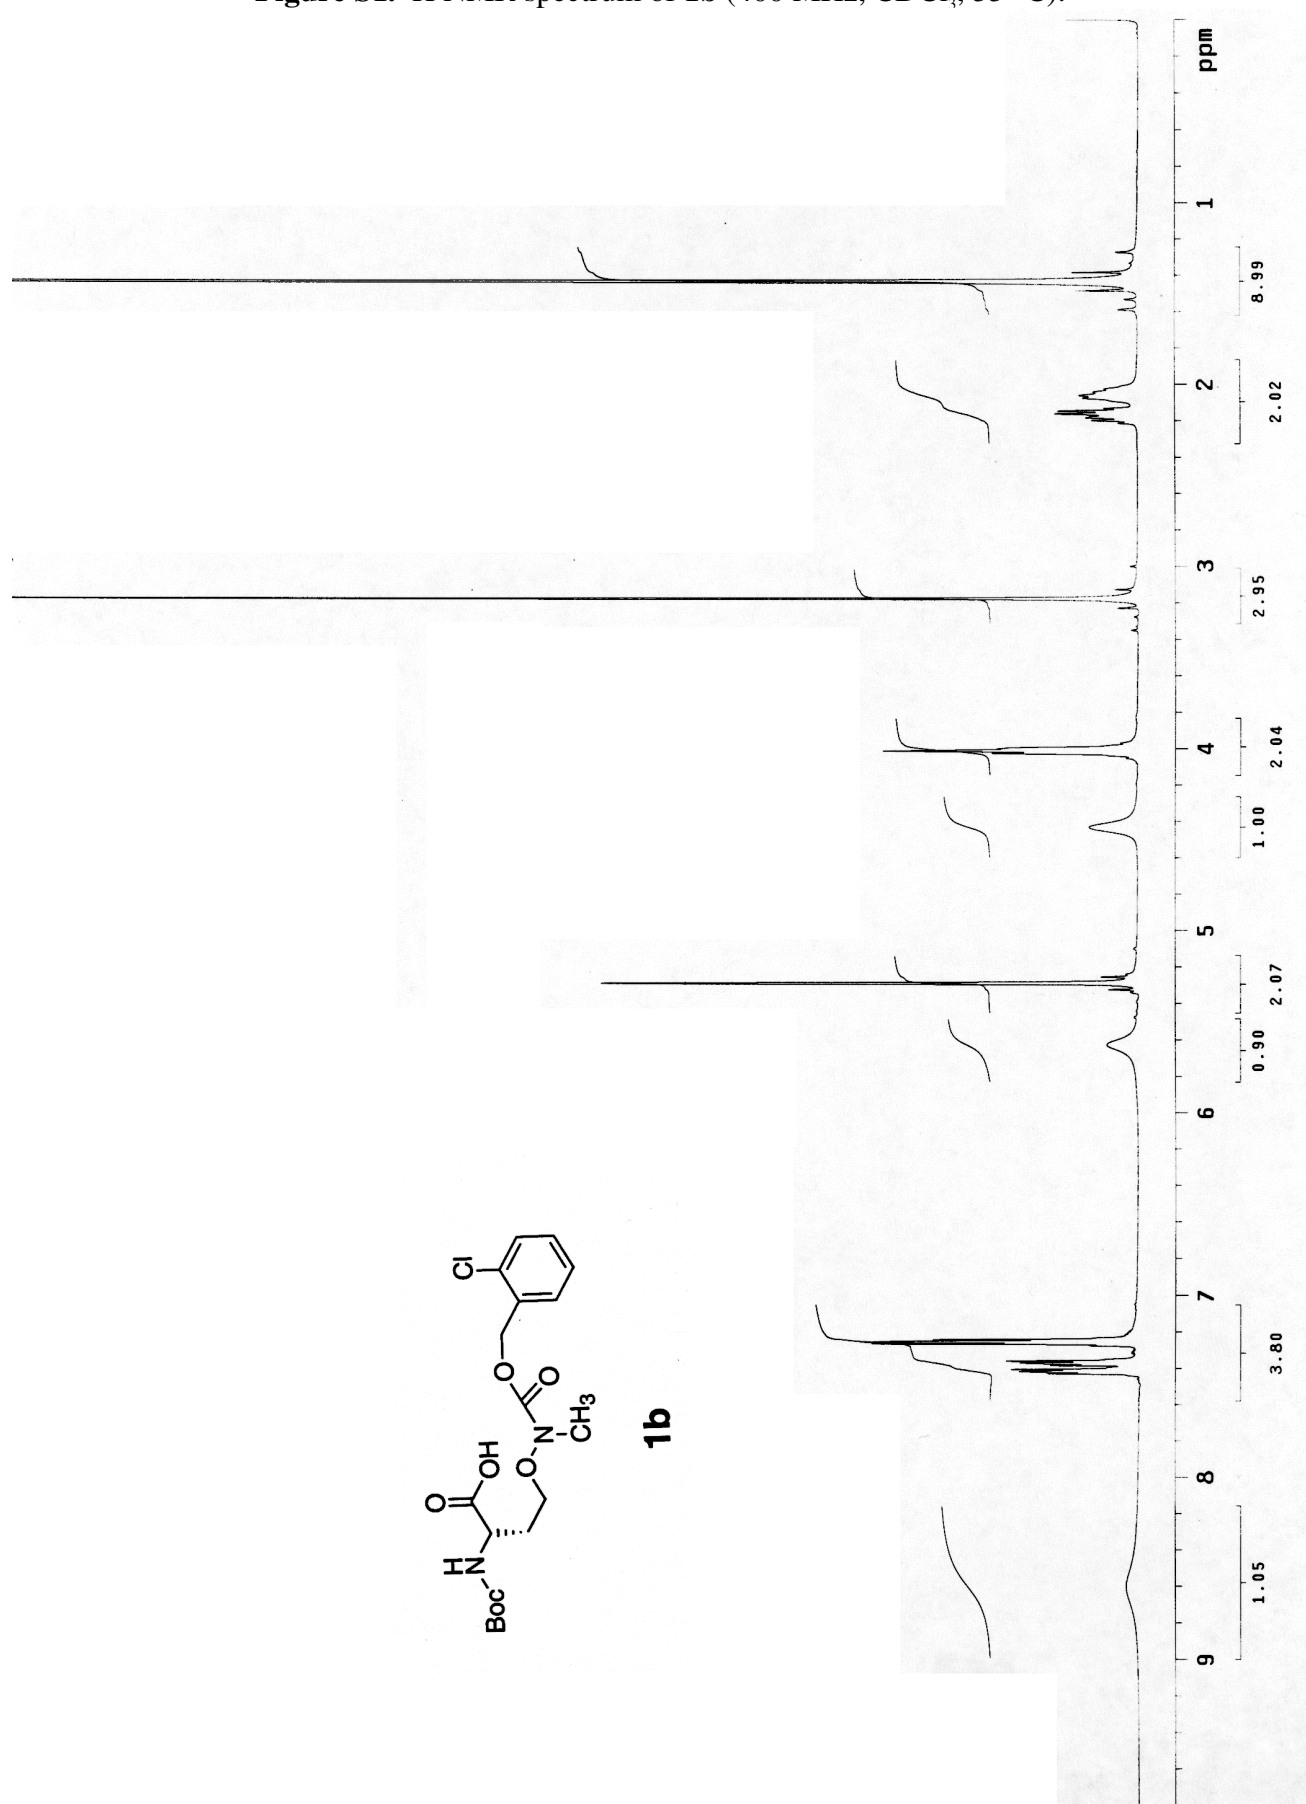

**Figure S2.**  $^{13}\text{C}$  NMR spectrum of **1b** (100 MHz,  $\text{CDCl}_3$ , 55  $^\circ\text{C}$ ).

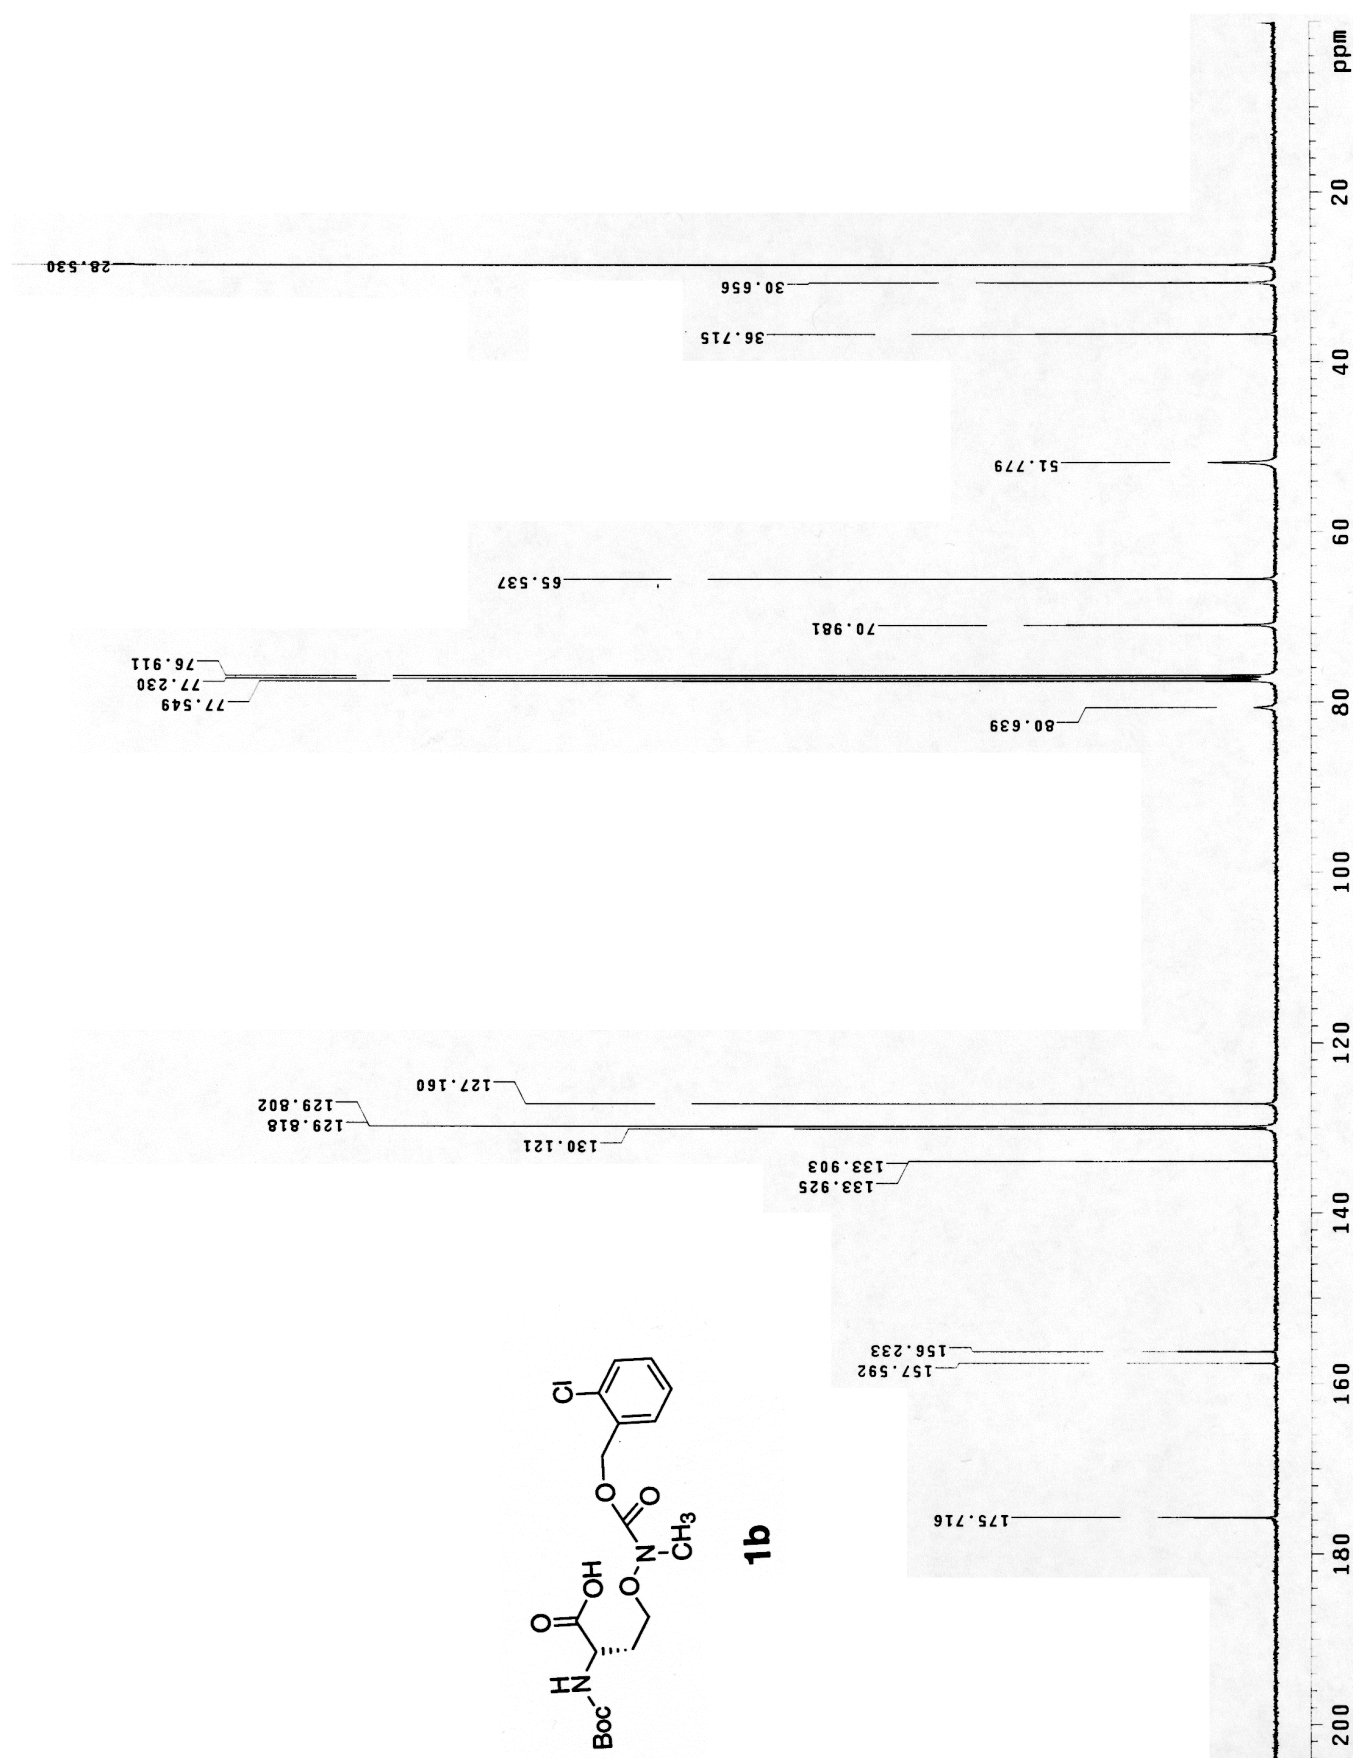

**Figure S3.**  $^1\text{H}$  NMR spectrum of **2b** (400 MHz,  $\text{CD}_3\text{CN}$ , 55  $^\circ\text{C}$ ).

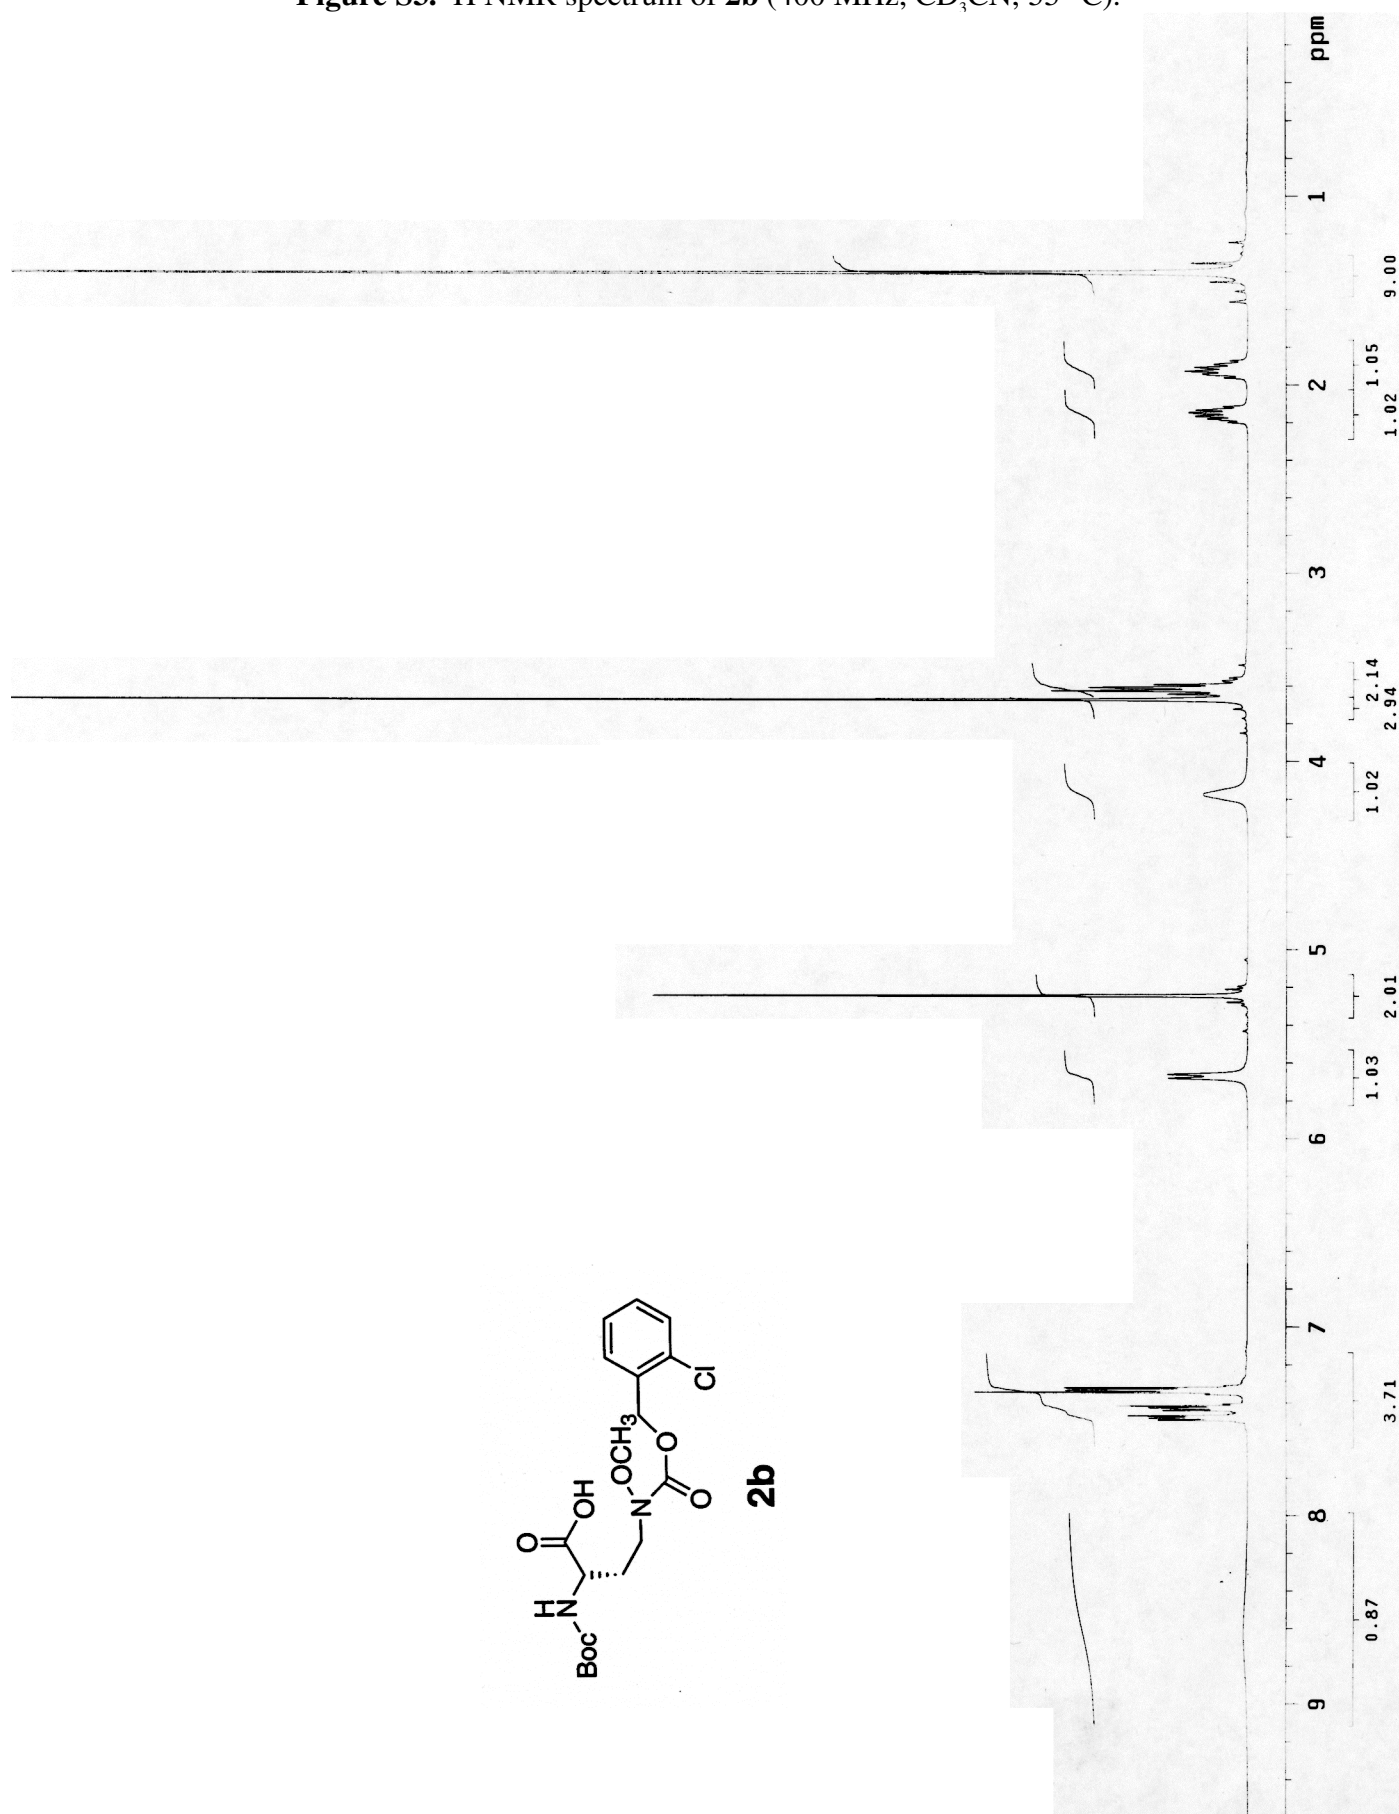

**Figure S4.**  $^{13}\text{C}$  NMR spectrum of **2b** (100 MHz,  $\text{CD}_3\text{CN}$ , 55  $^\circ\text{C}$ ).

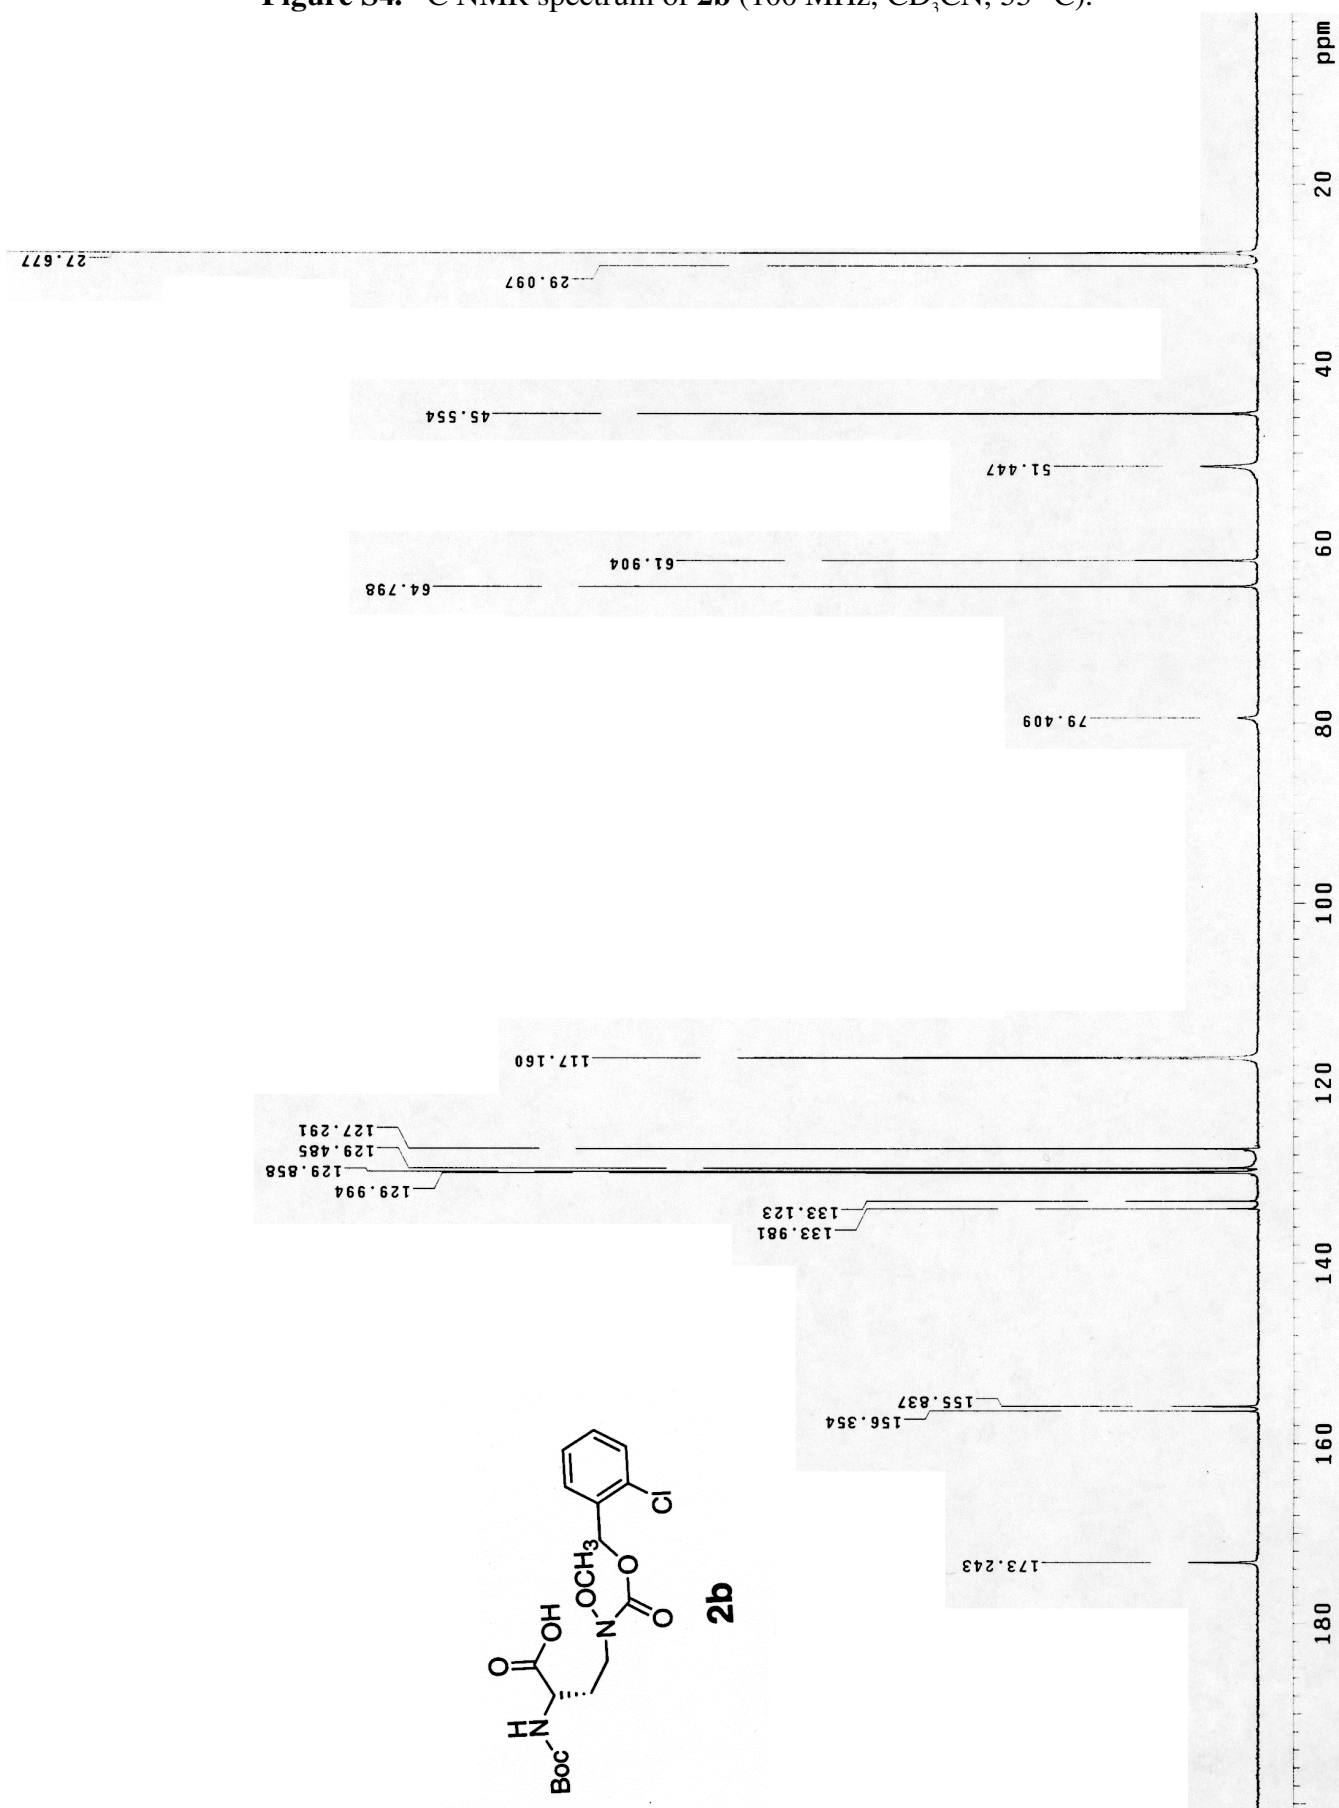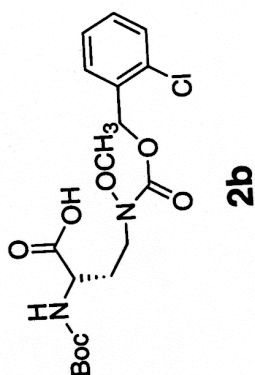

**Figure S5.**  $^1\text{H}$  NMR spectrum of **3b** (400 MHz,  $\text{CD}_3\text{CN}$ , 55  $^\circ\text{C}$ ).

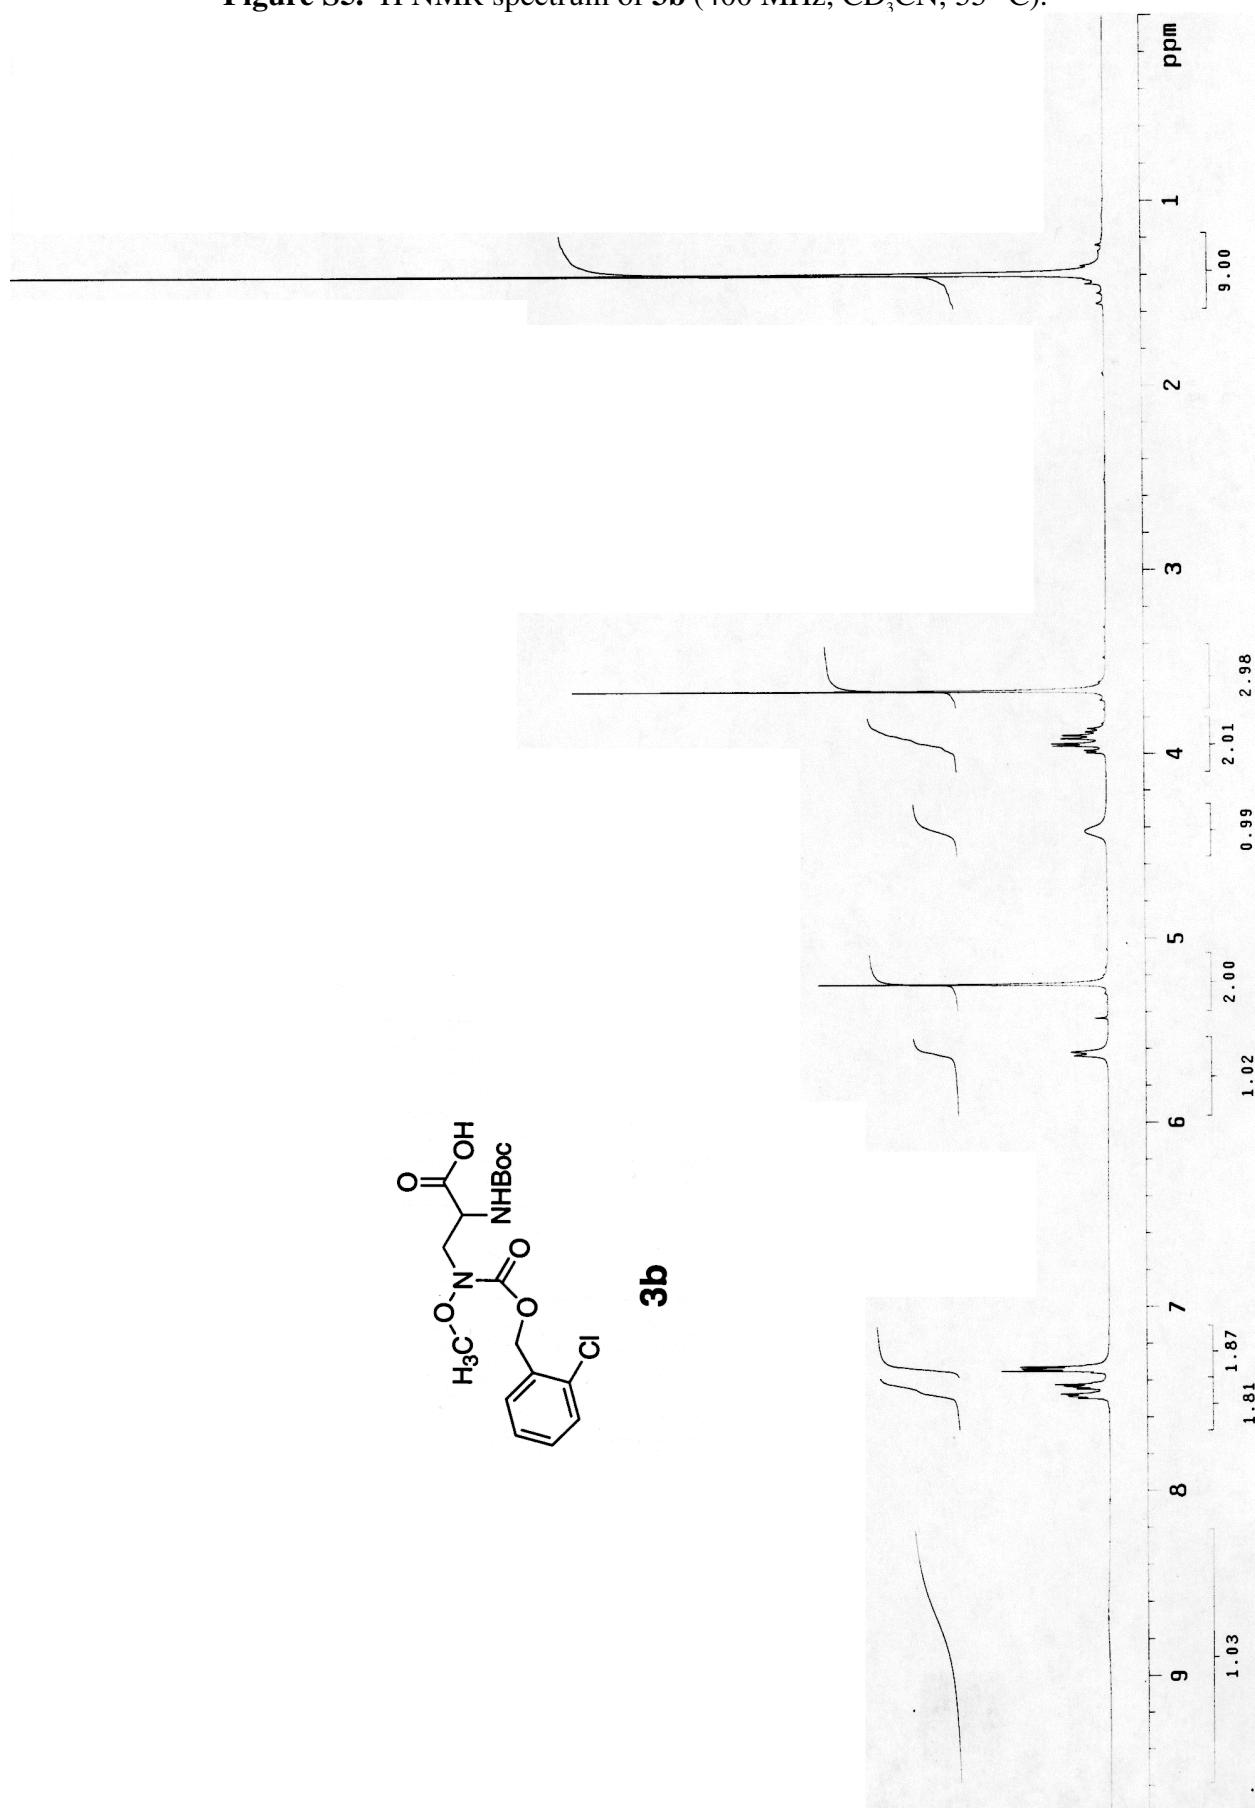

**Figure S6.**  $^{13}\text{C}$  NMR spectrum of **3b** (100 MHz,  $\text{CD}_3\text{CN}$ , 55  $^\circ\text{C}$ ).

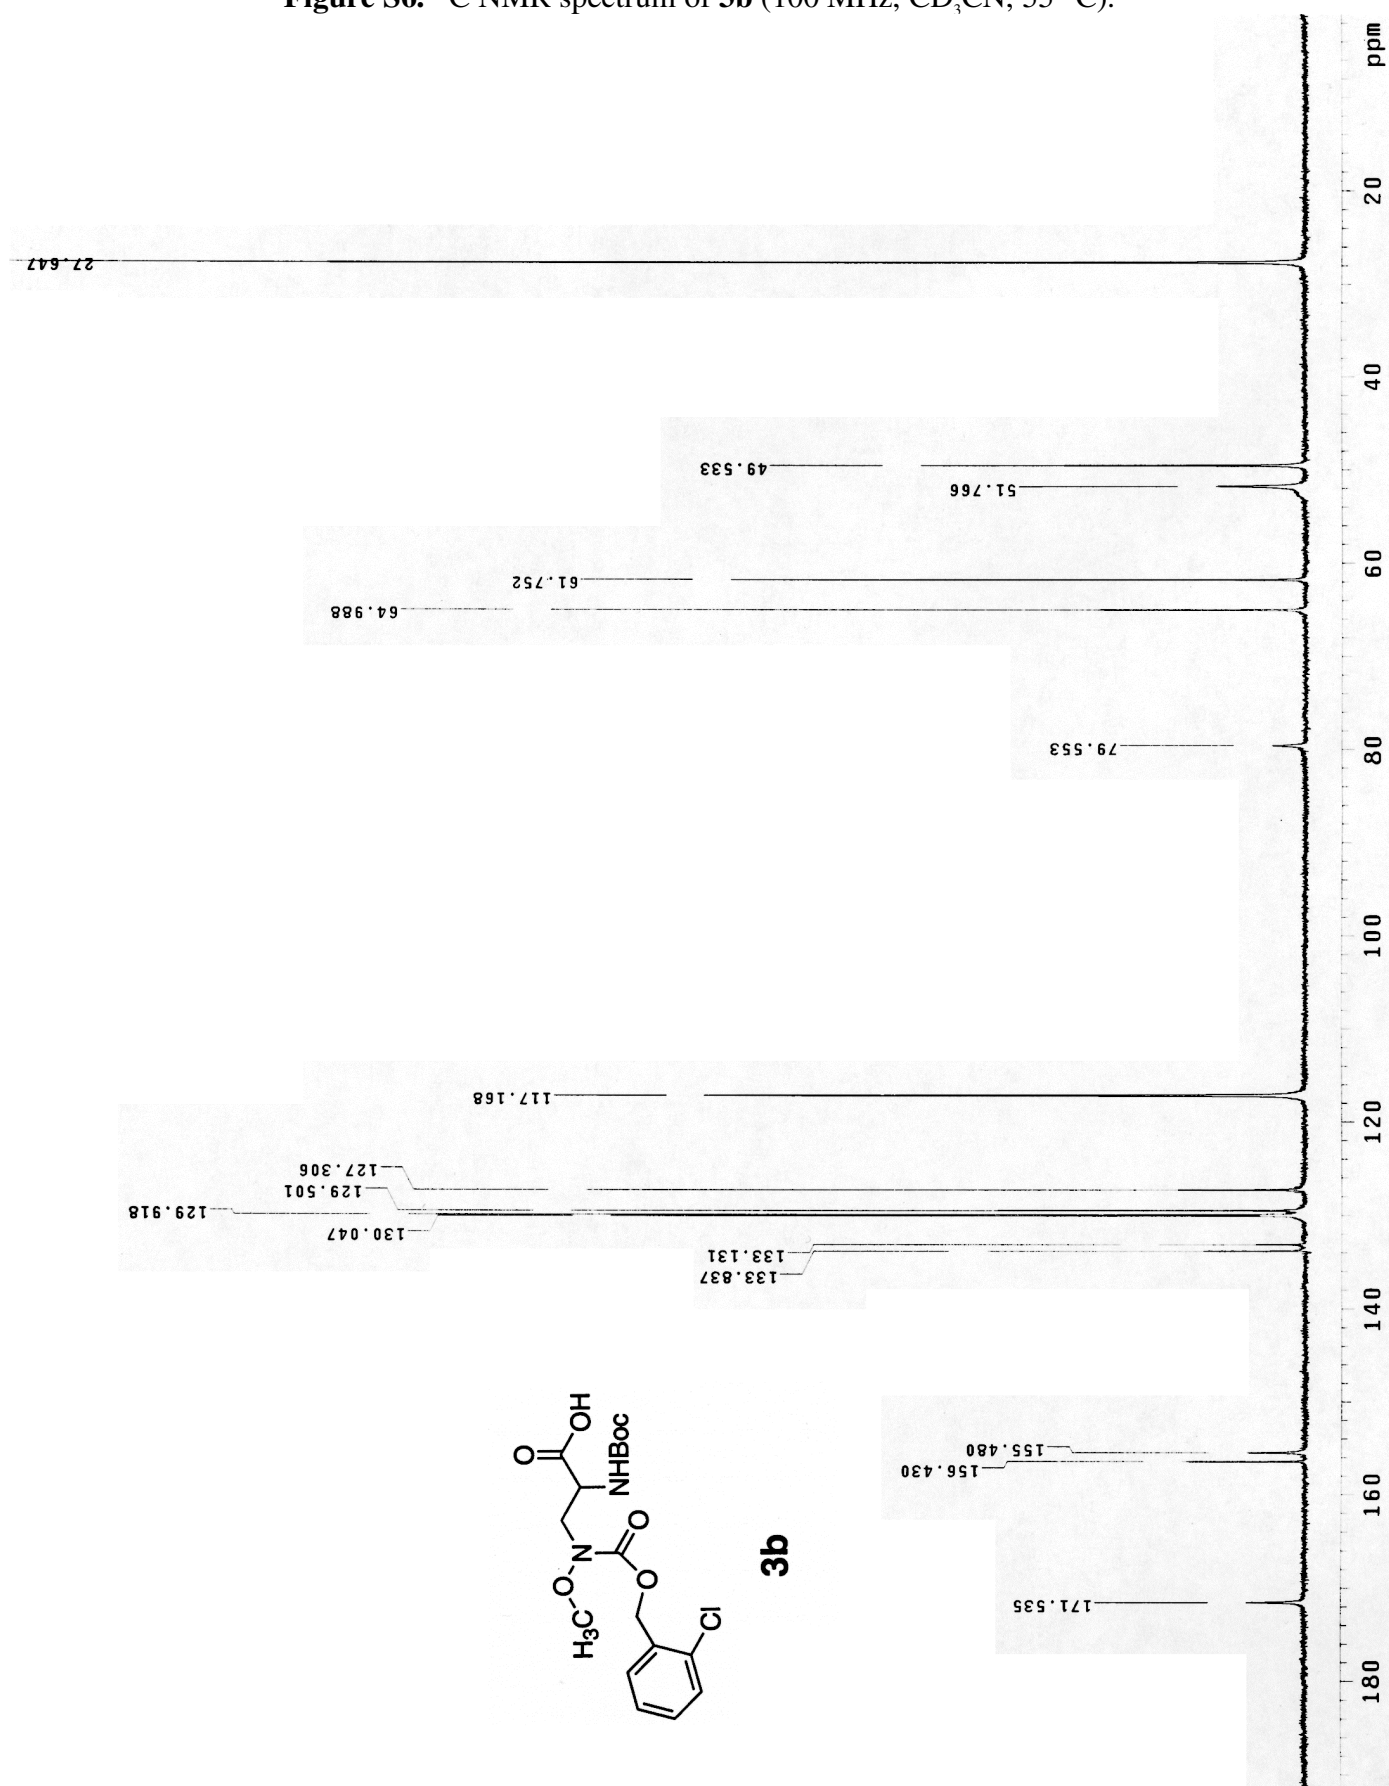



**Figure S7.**  $^1\text{H}$  NMR spectrum of **4b** (400 MHz,  $\text{CD}_3\text{CN}$ , 55  $^\circ\text{C}$ ).

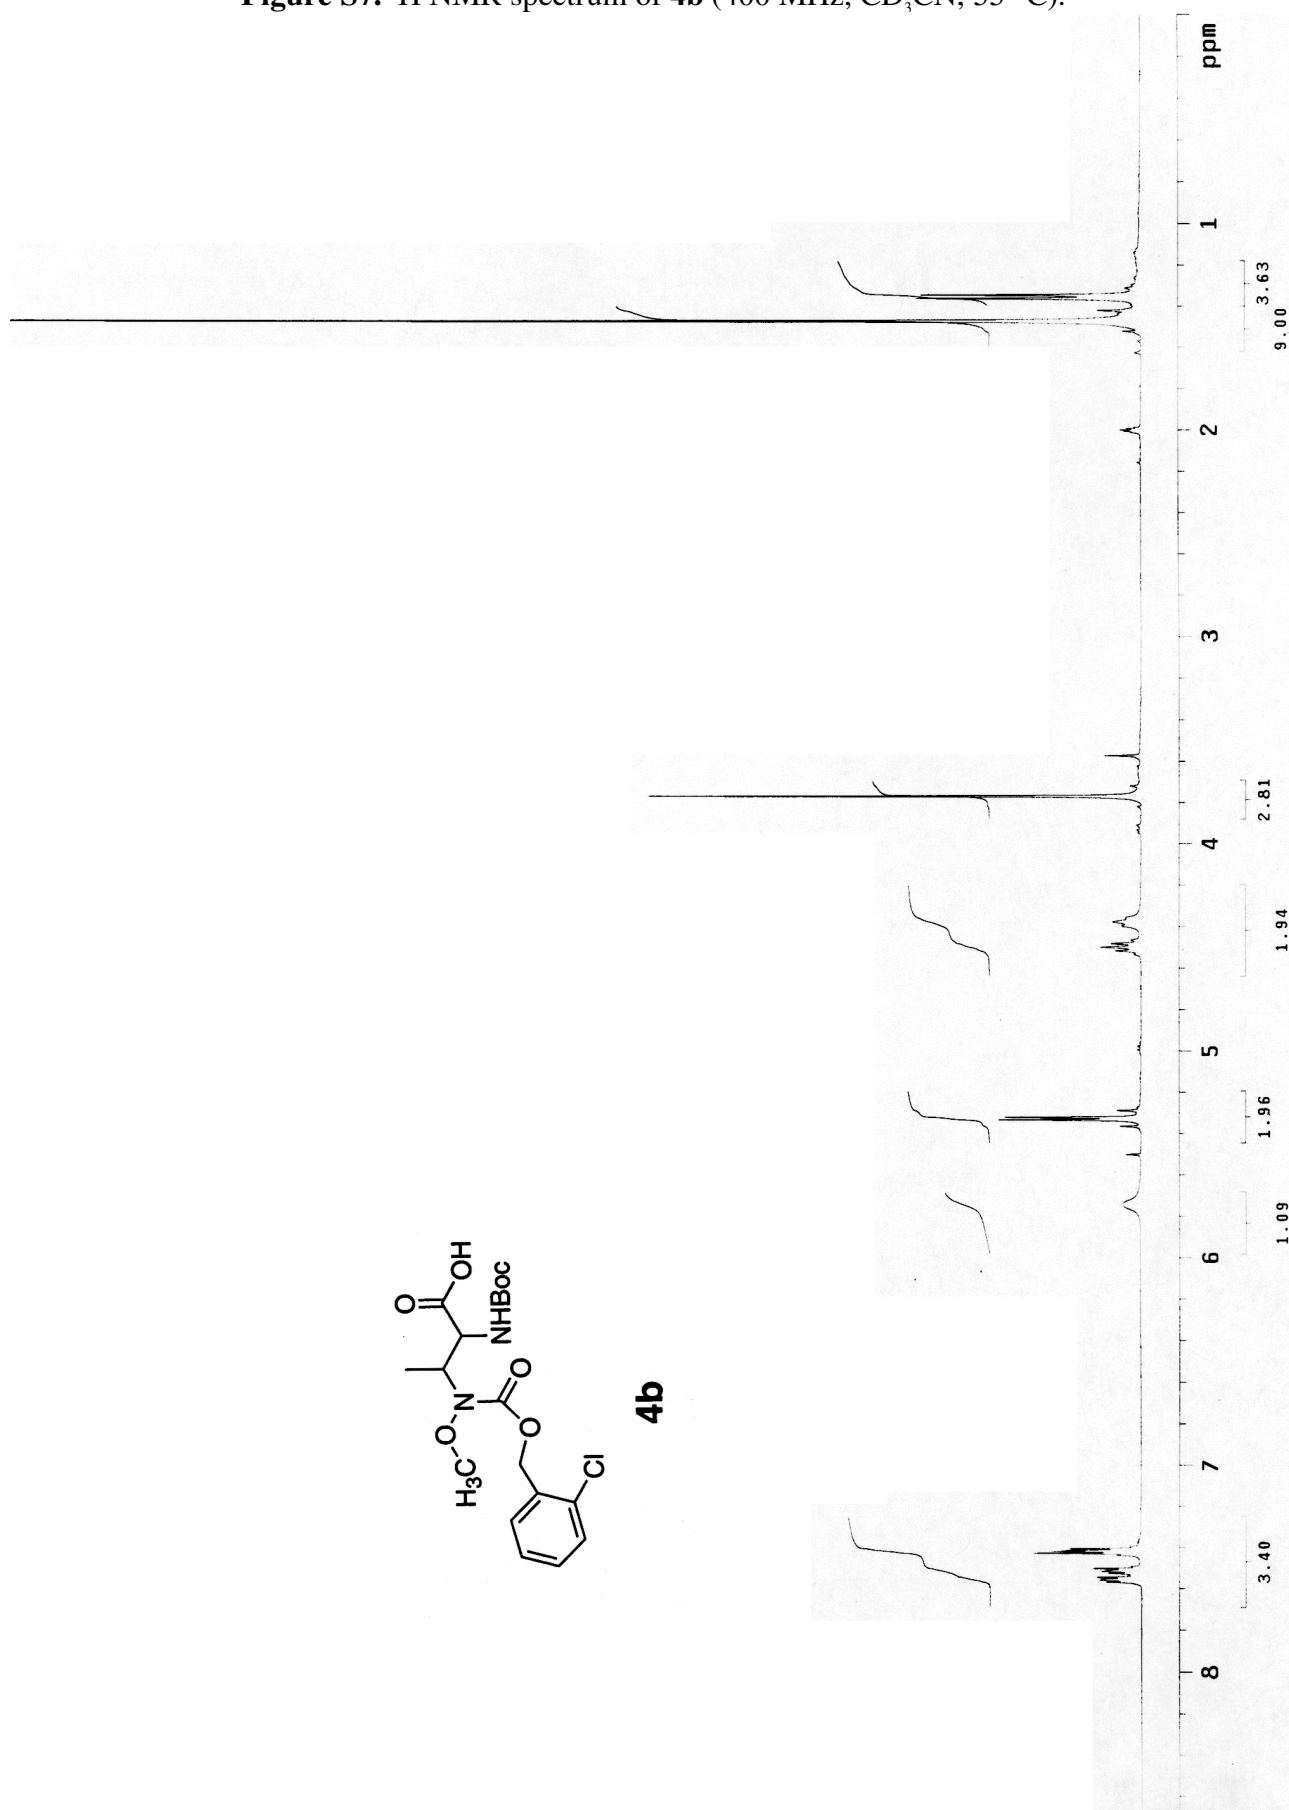

**Figure S8.**  $^{13}\text{C}$  NMR spectrum of **4b** (100 MHz,  $\text{CD}_3\text{CN}$ ).

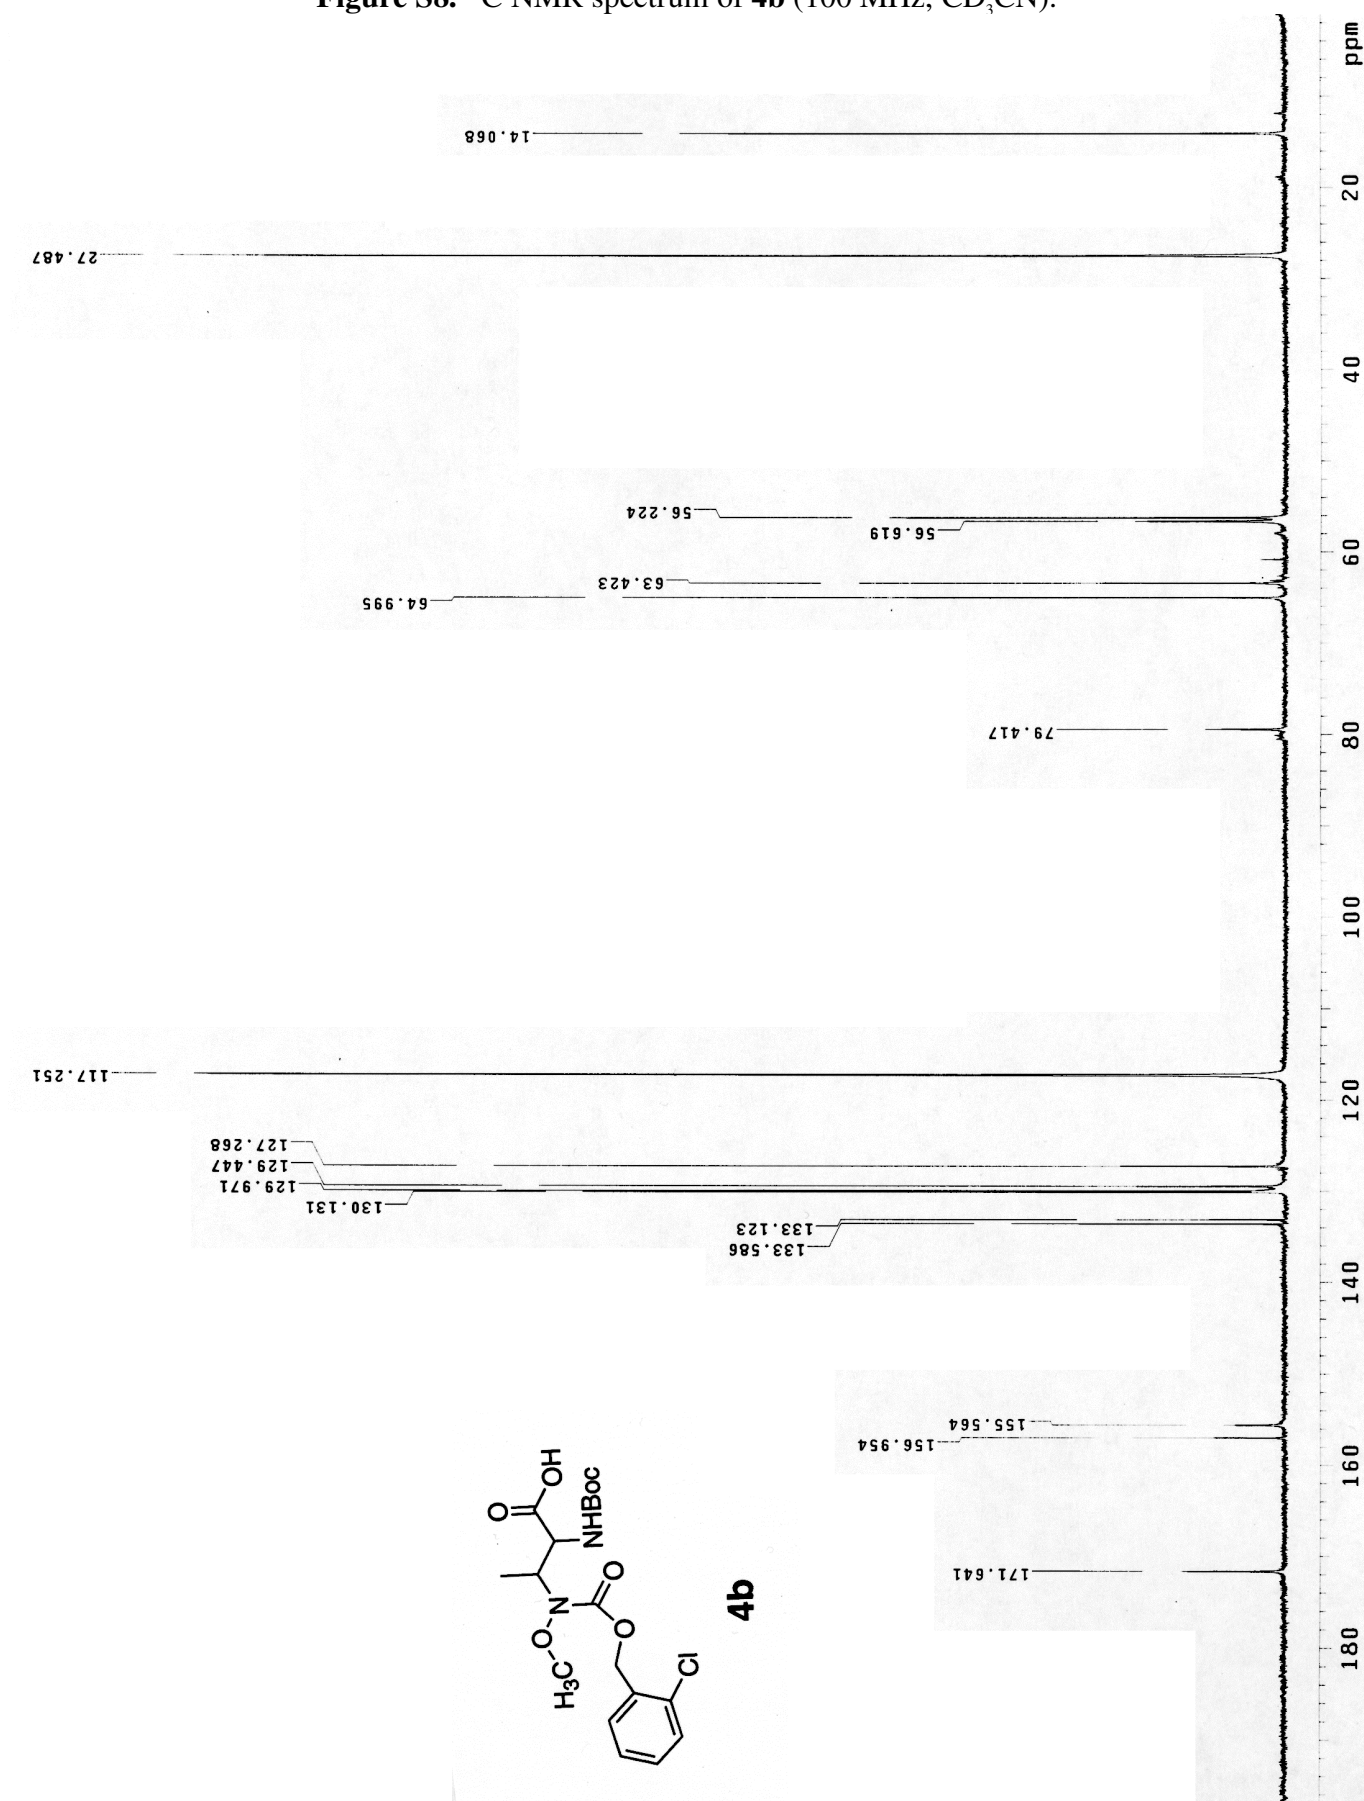

**Figure S9.**  $^1\text{H}$  NMR spectrum of **5** (400 MHz,  $\text{CDCl}_3$ ).

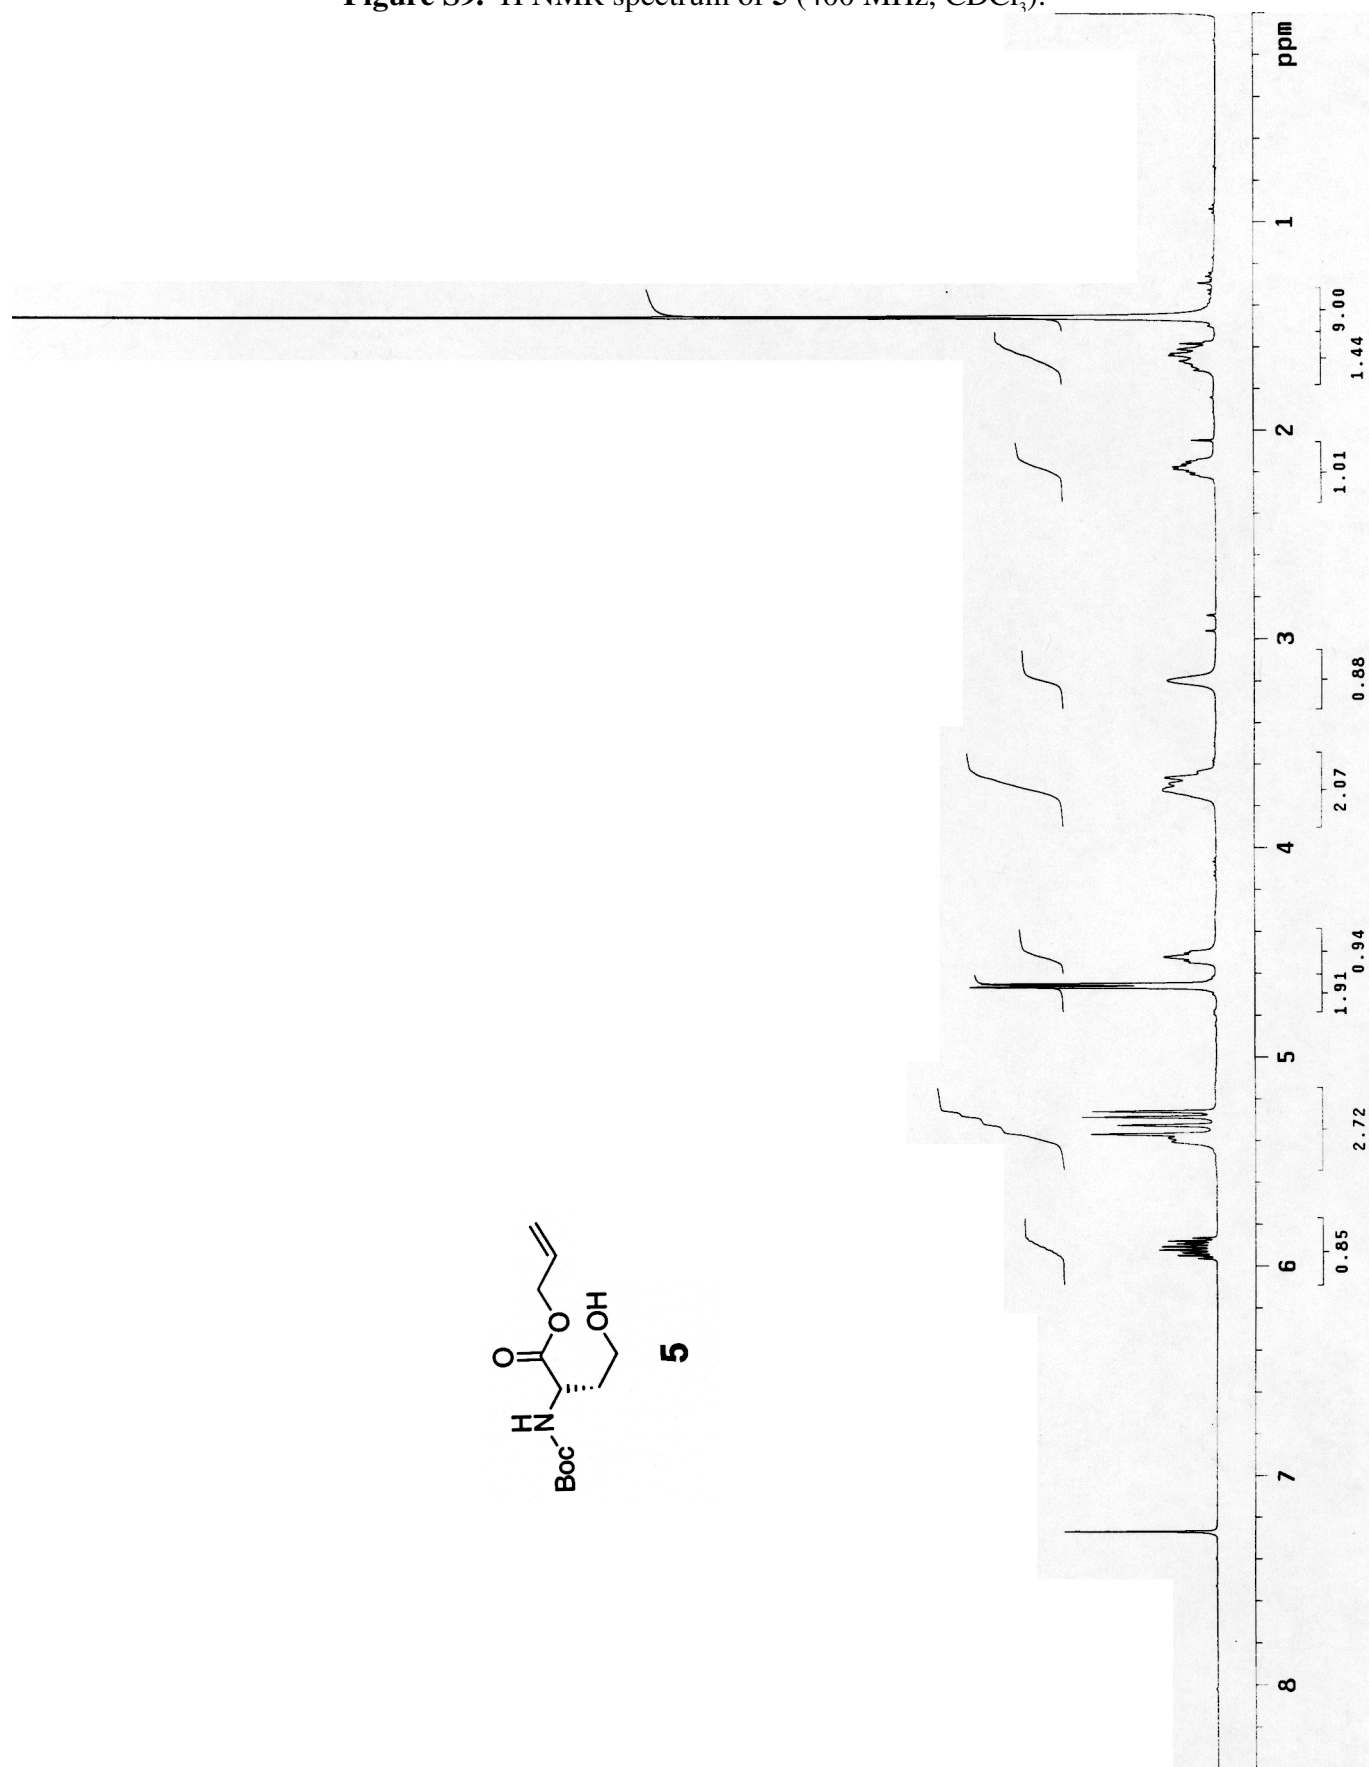

**Figure S10.**  $^{13}\text{C}$  NMR spectrum of **5** (100 MHz,  $\text{CDCl}_3$ ).

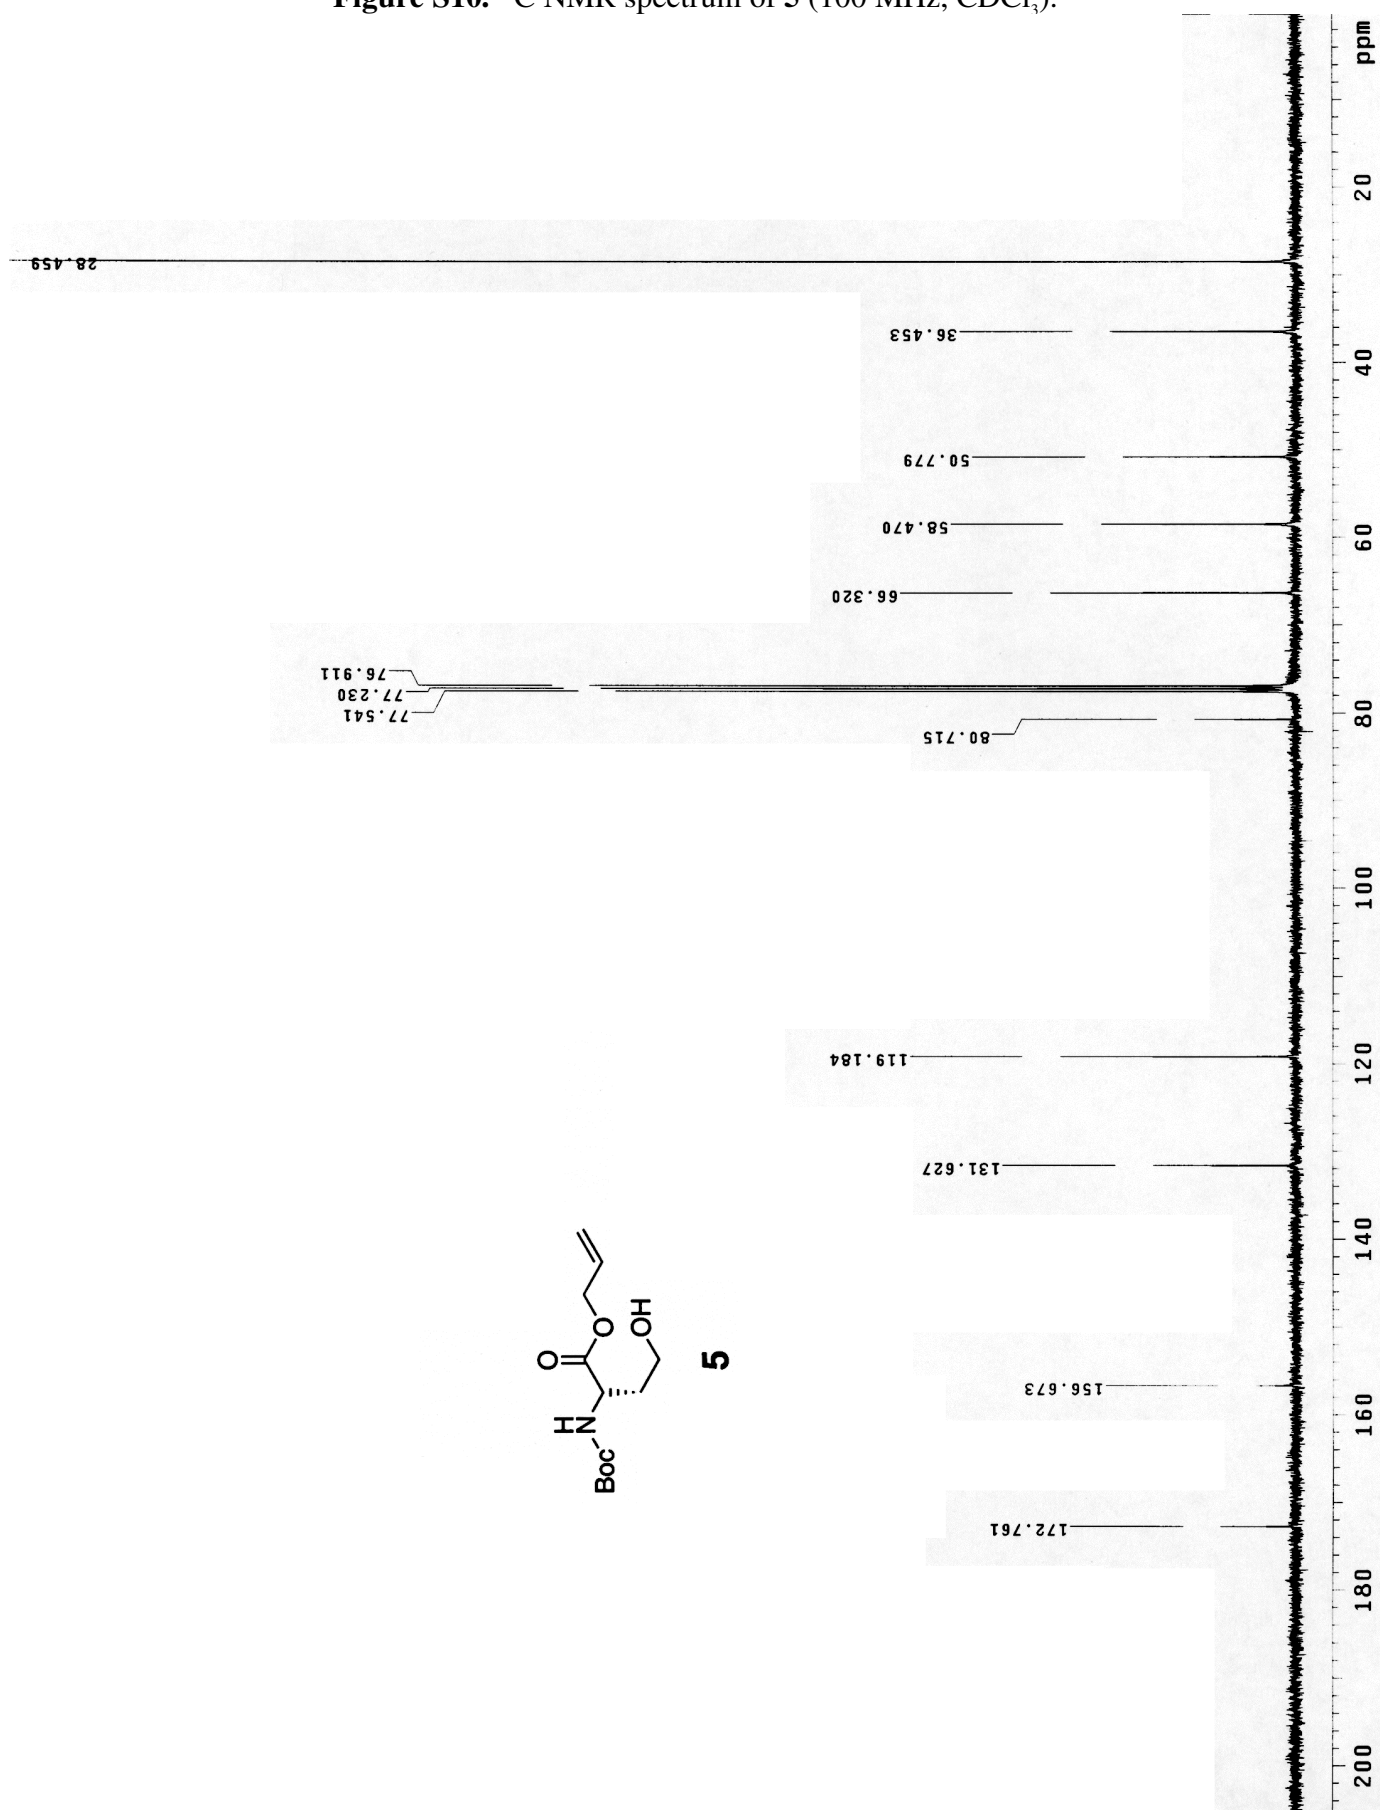

**Figure S11.**  $^1\text{H}$  NMR spectrum of **6** (400 MHz,  $\text{CDCl}_3$ ).

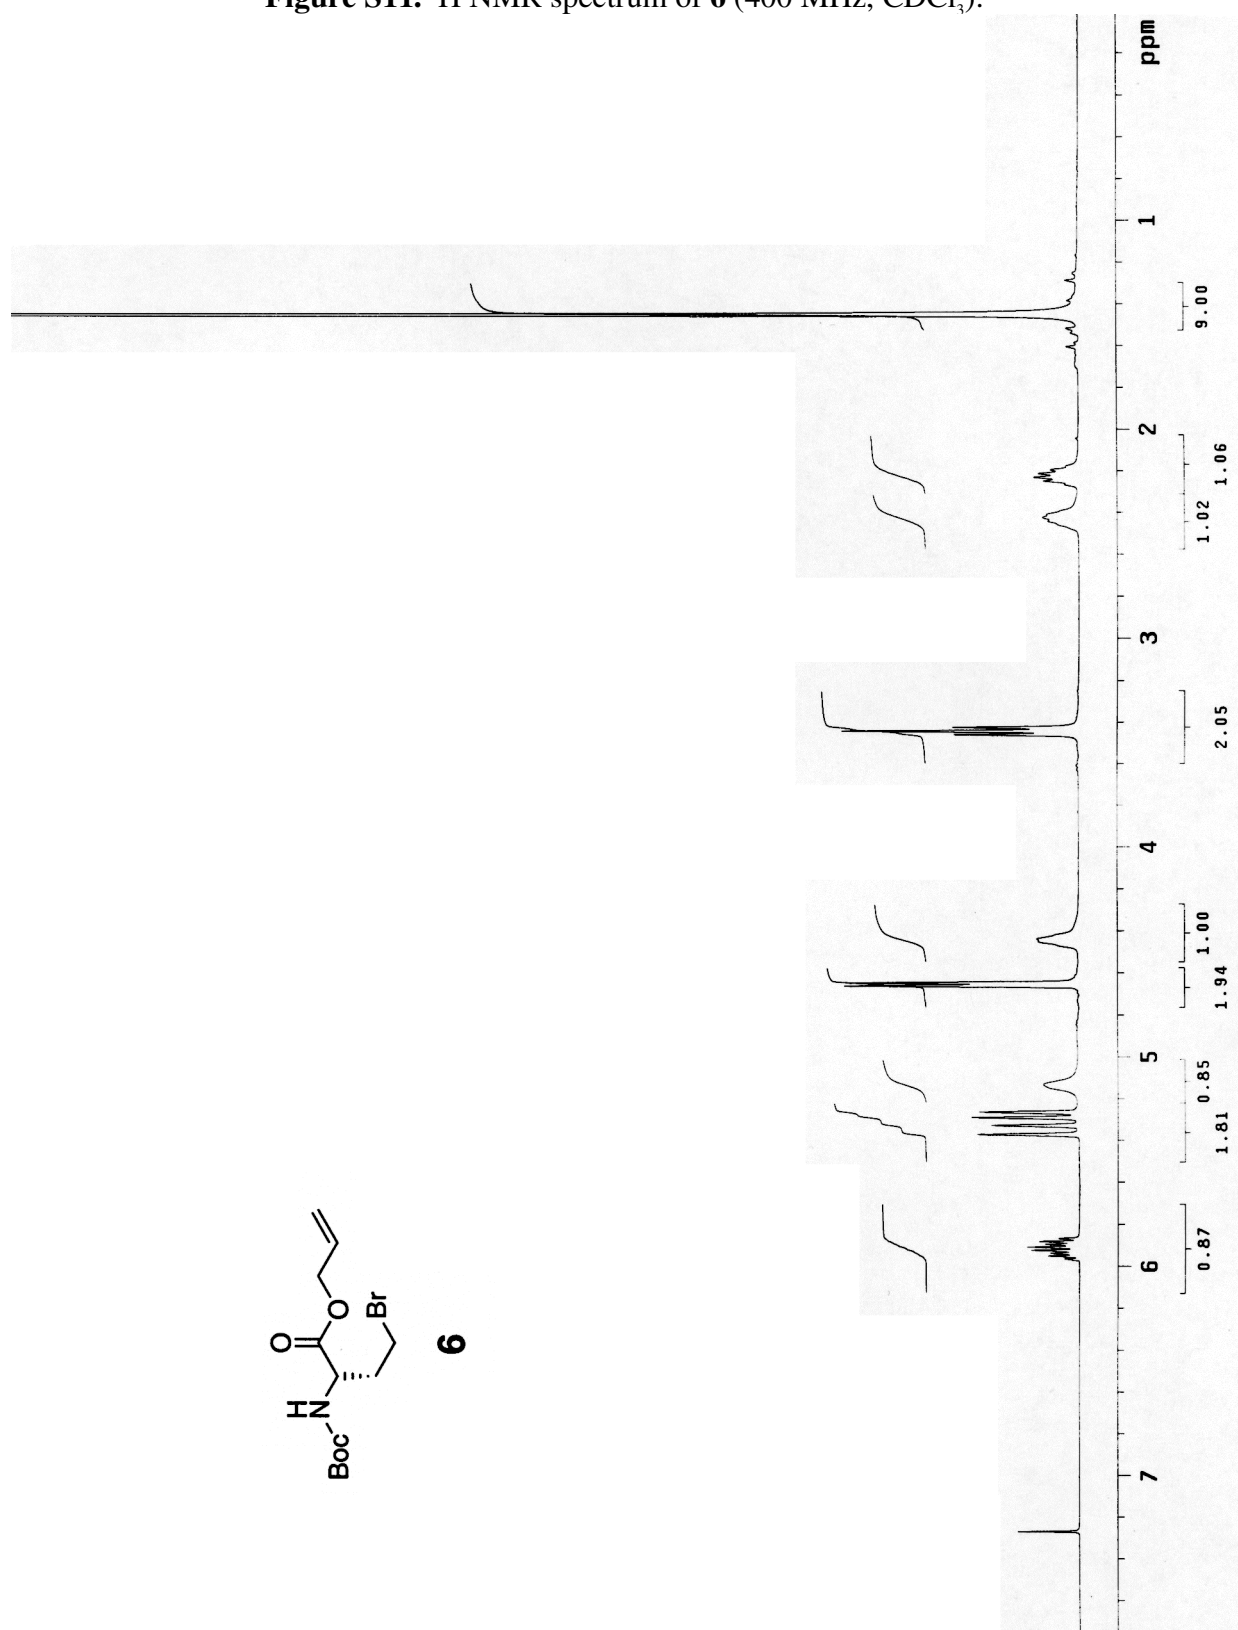

Figure S12.  $^{13}\text{C}$  NMR spectrum of **6** (100 MHz,  $\text{CDCl}_3$ ).

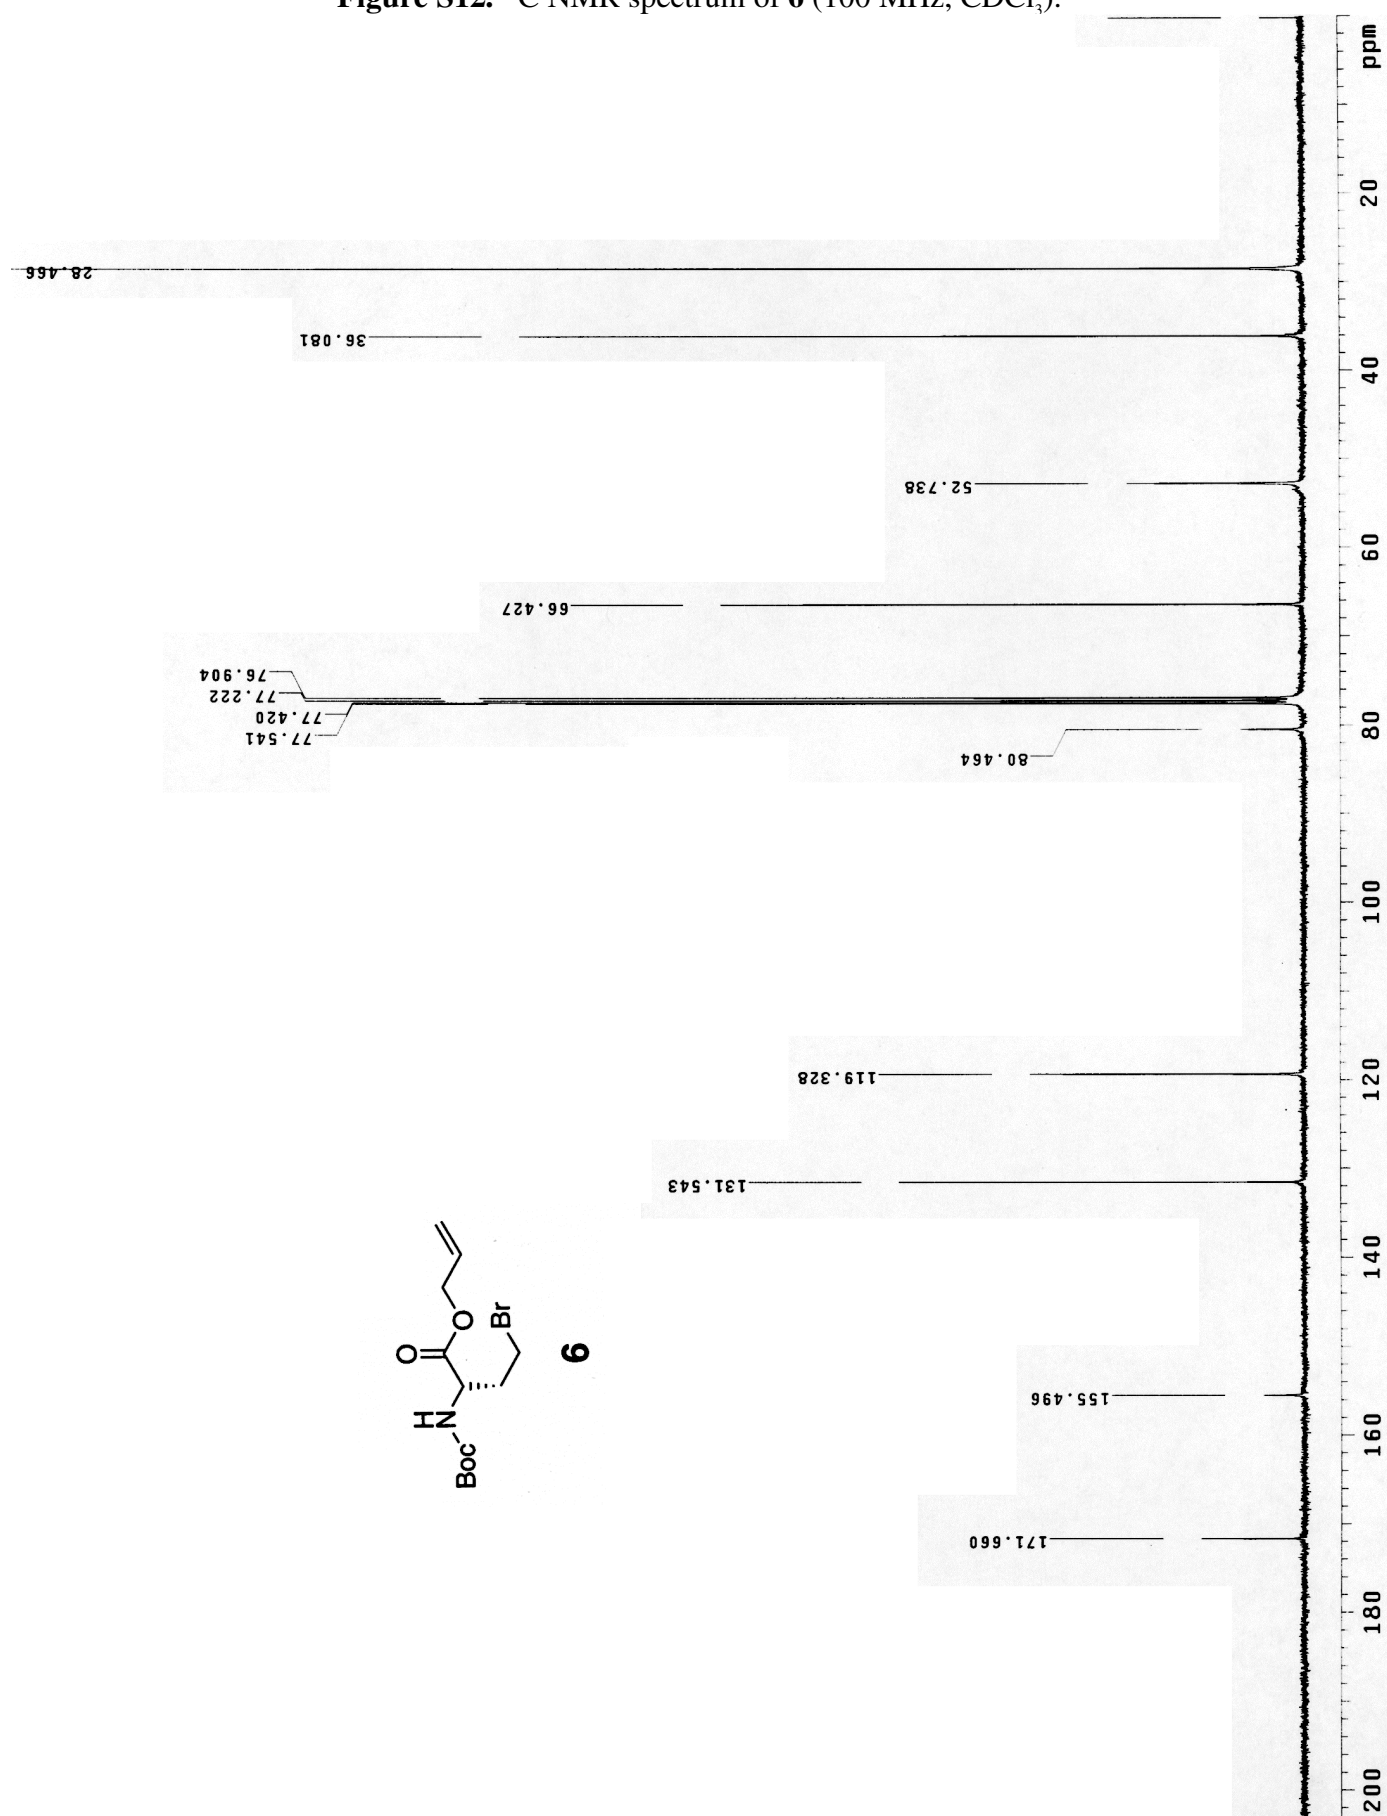

**Figure S13.**  $^1\text{H}$  NMR spectrum of **7** (400 MHz,  $\text{CDCl}_3$ ).

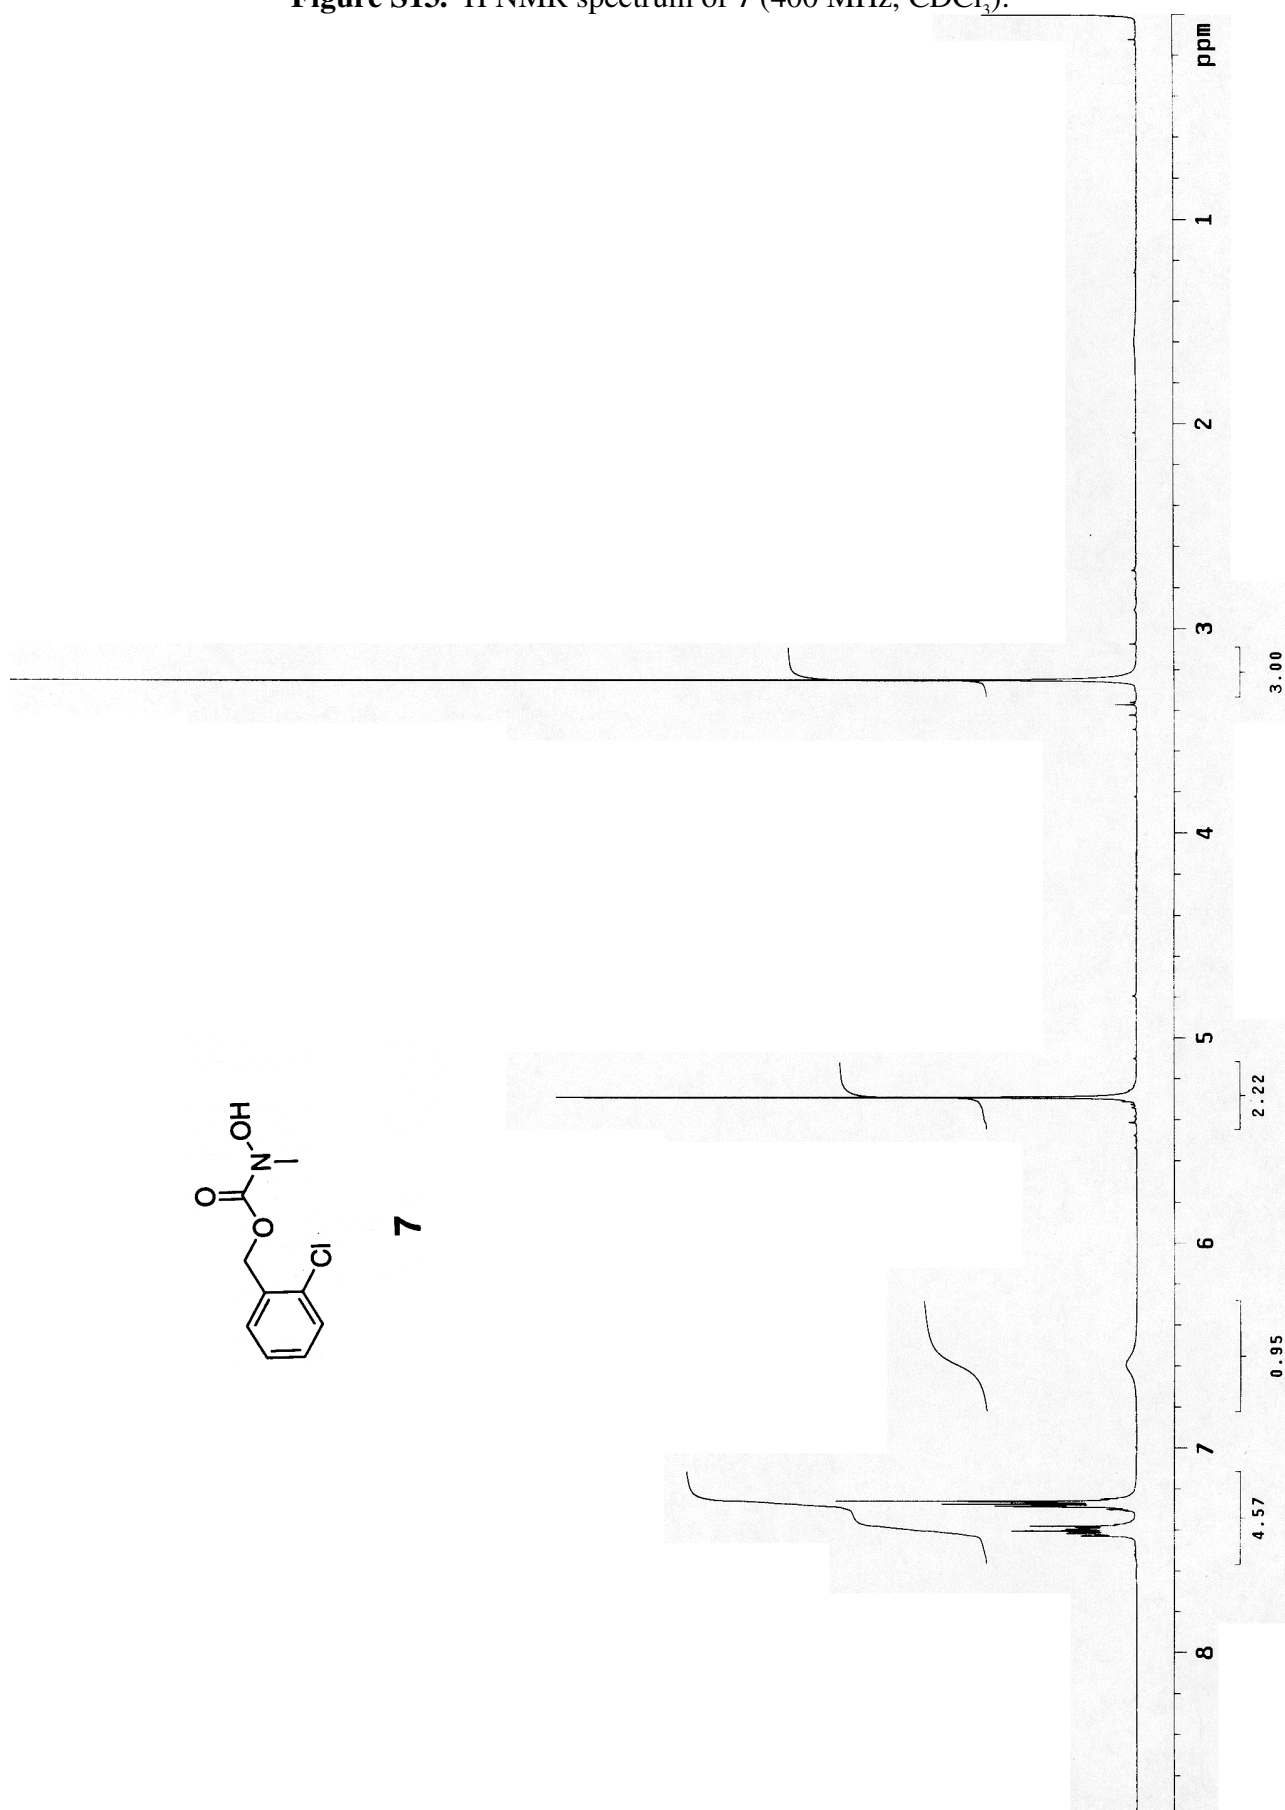

**Figure S14.**  $^{13}\text{C}$  NMR spectrum of **7** (100 MHz,  $\text{CDCl}_3$ ).

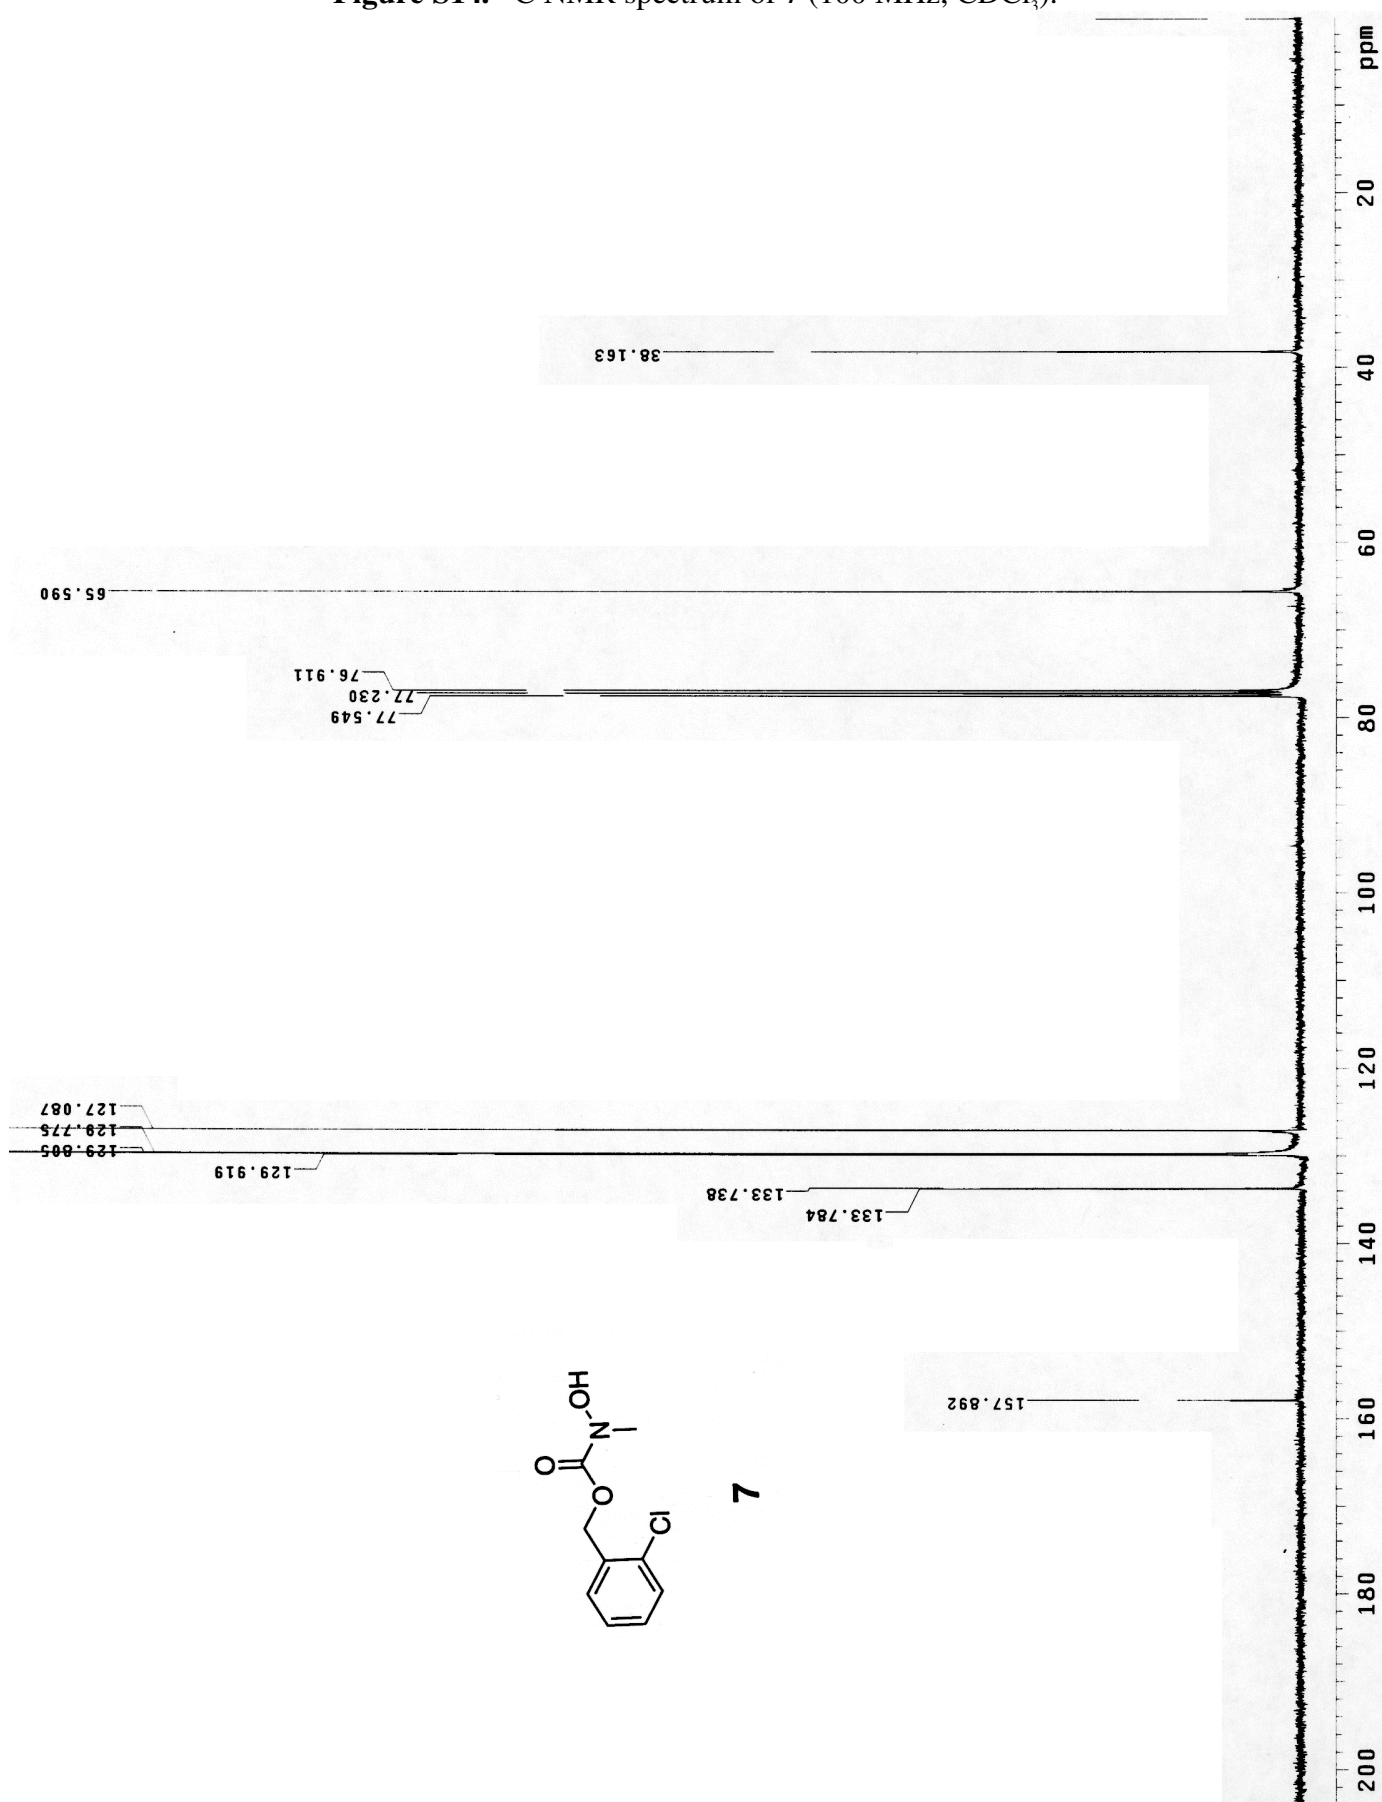



**Figure S15.**  $^1\text{H}$  NMR spectrum of **8** (400 MHz,  $\text{CDCl}_3$ ).

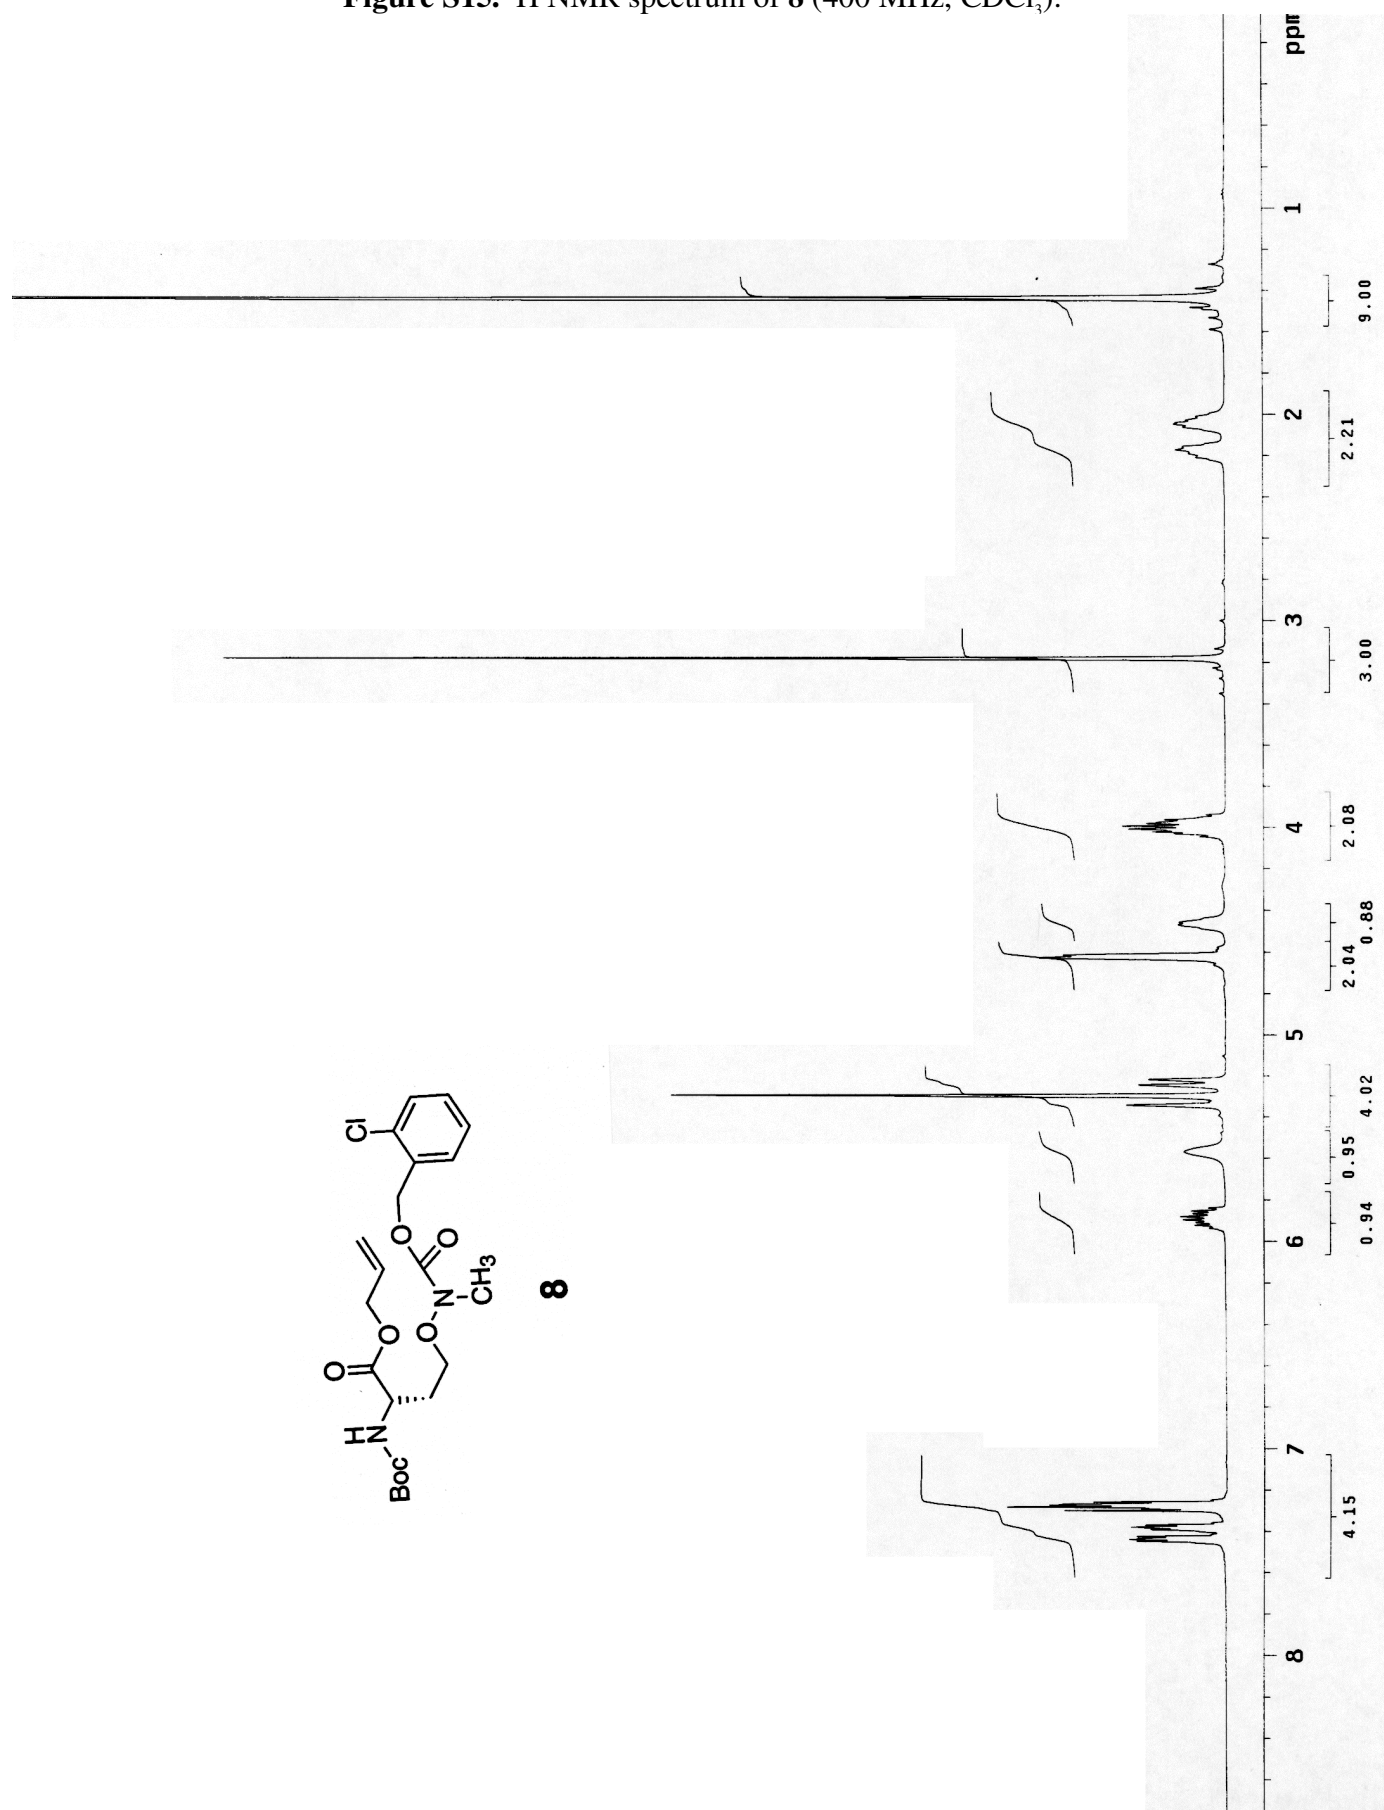

**Figure S16.**  $^{13}\text{C}$  NMR spectrum of **8** (100 MHz,  $\text{CDCl}_3$ ).

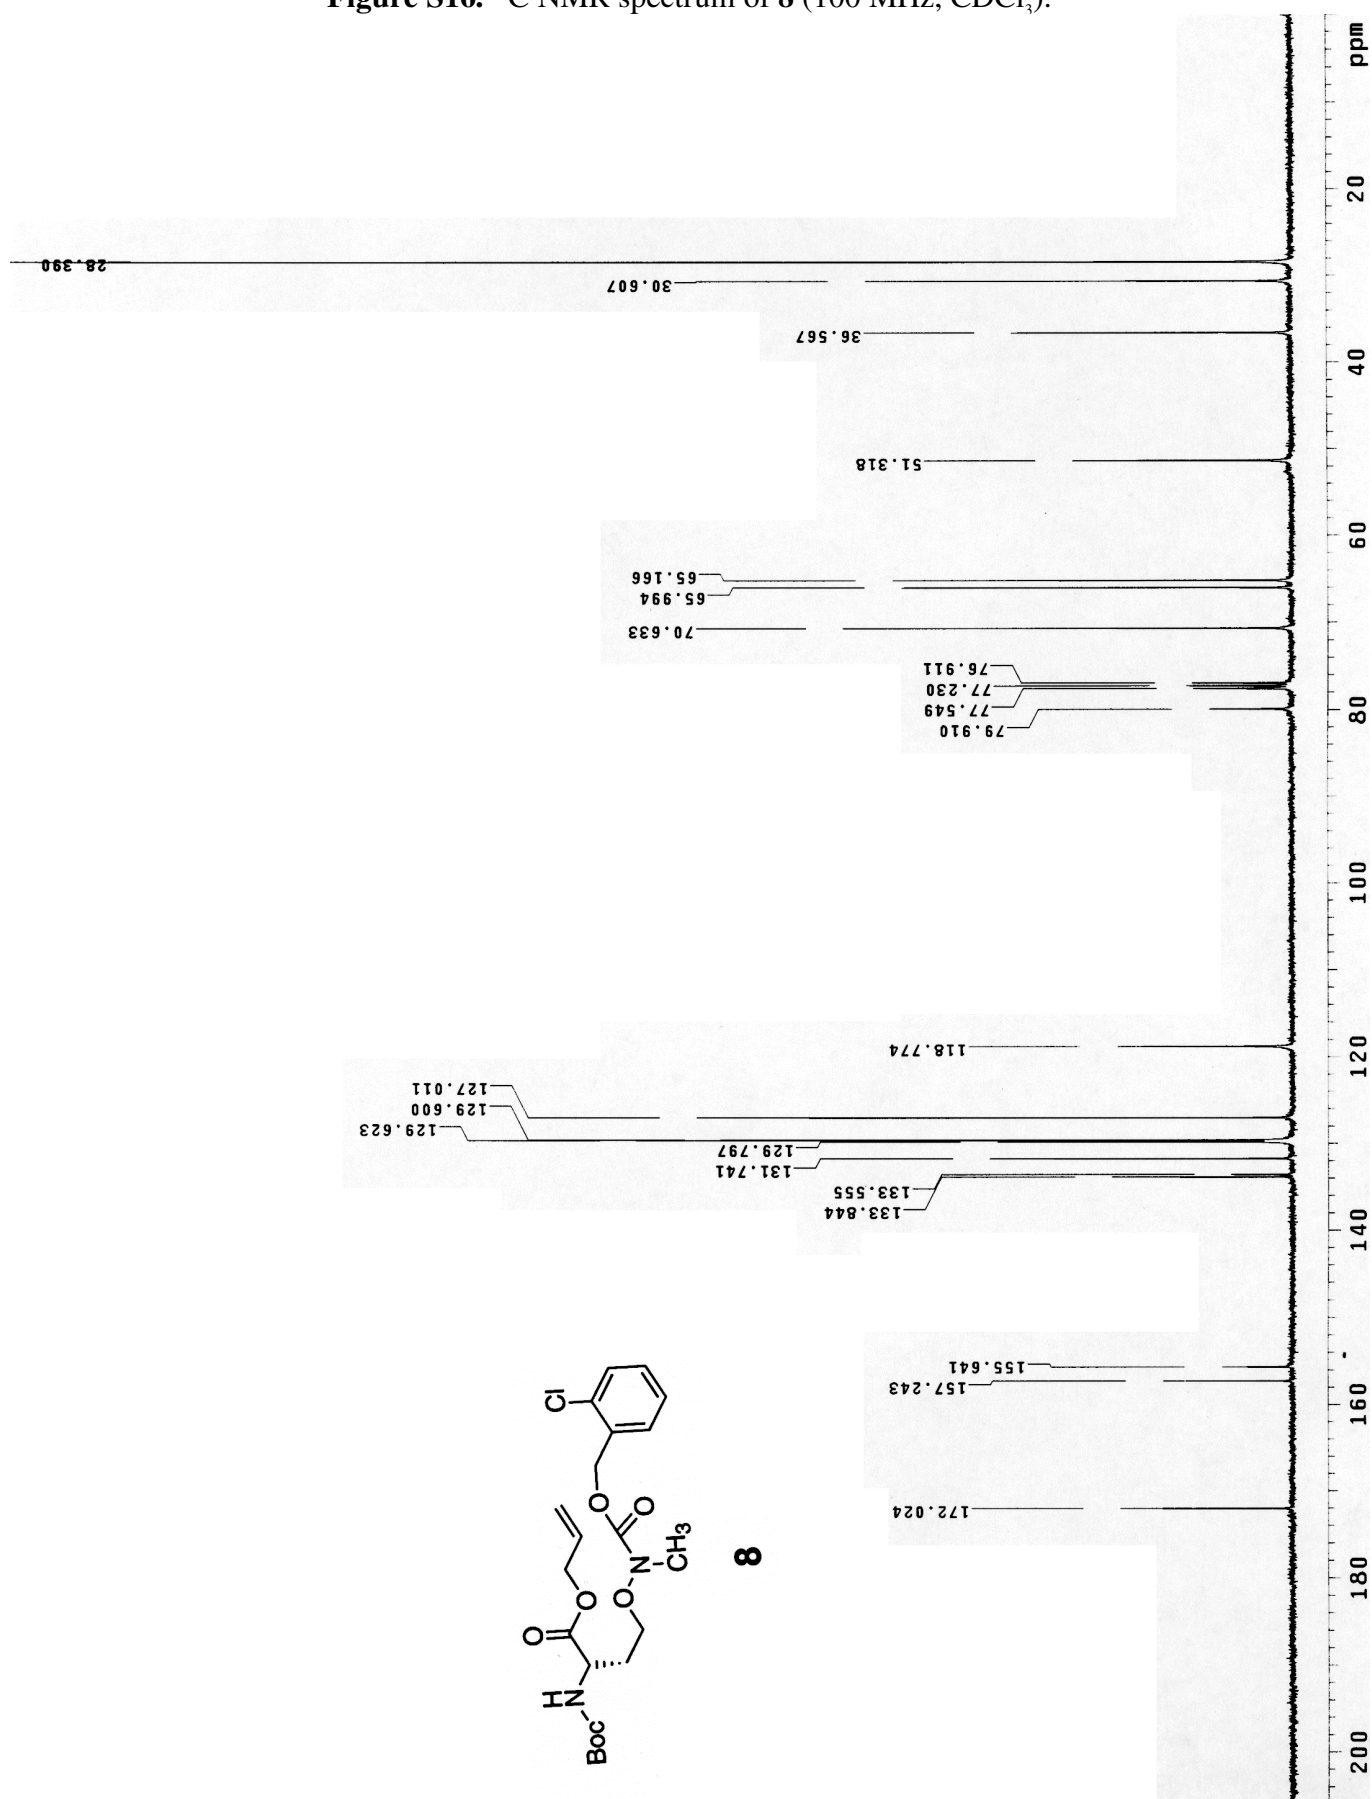

**Figure S17.**  $^1\text{H}$  NMR spectrum of **9** (400 MHz,  $\text{CDCl}_3$ ).

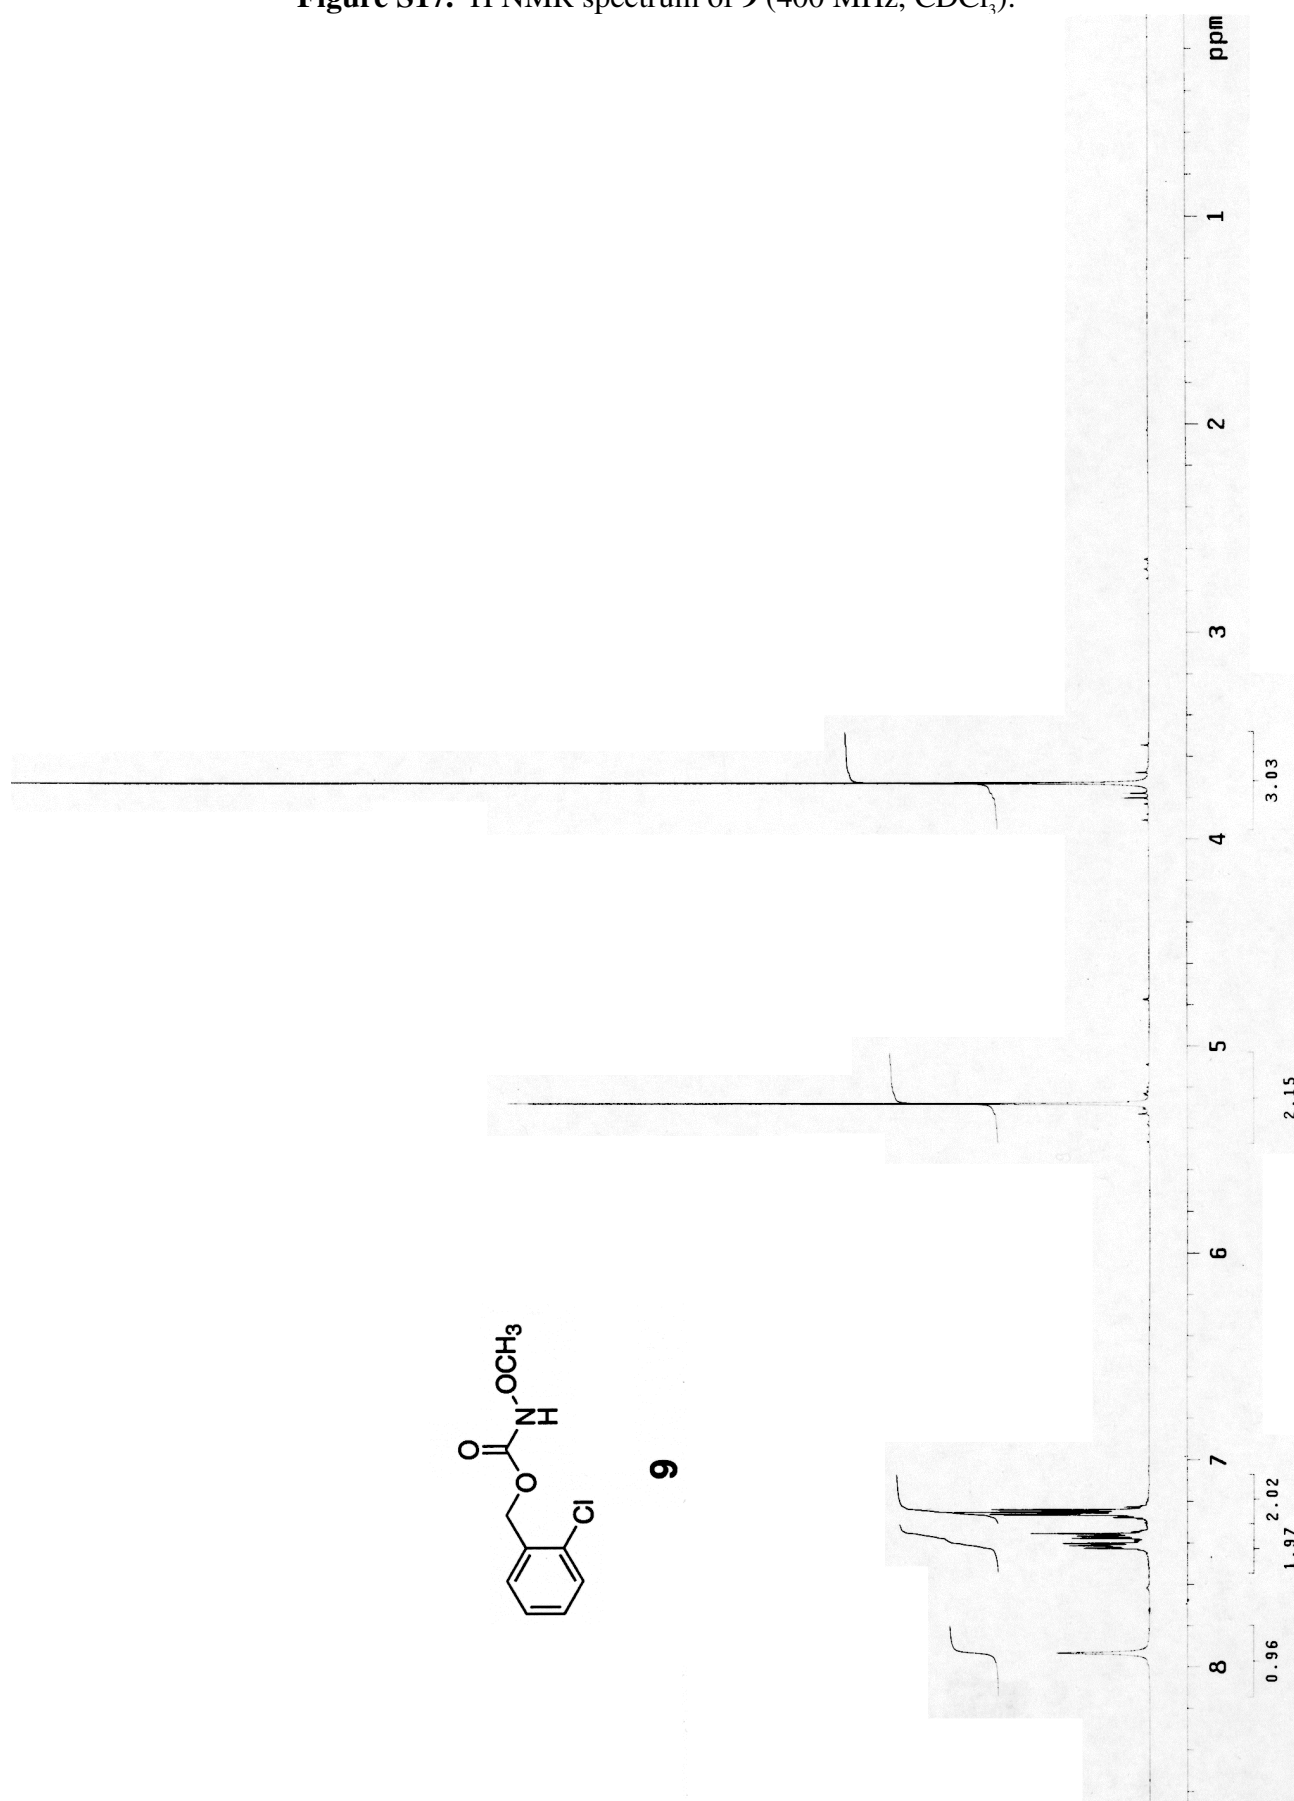

**Figure S18.**  $^{13}\text{C}$  NMR spectrum of **9** (100 MHz,  $\text{CDCl}_3$ ).

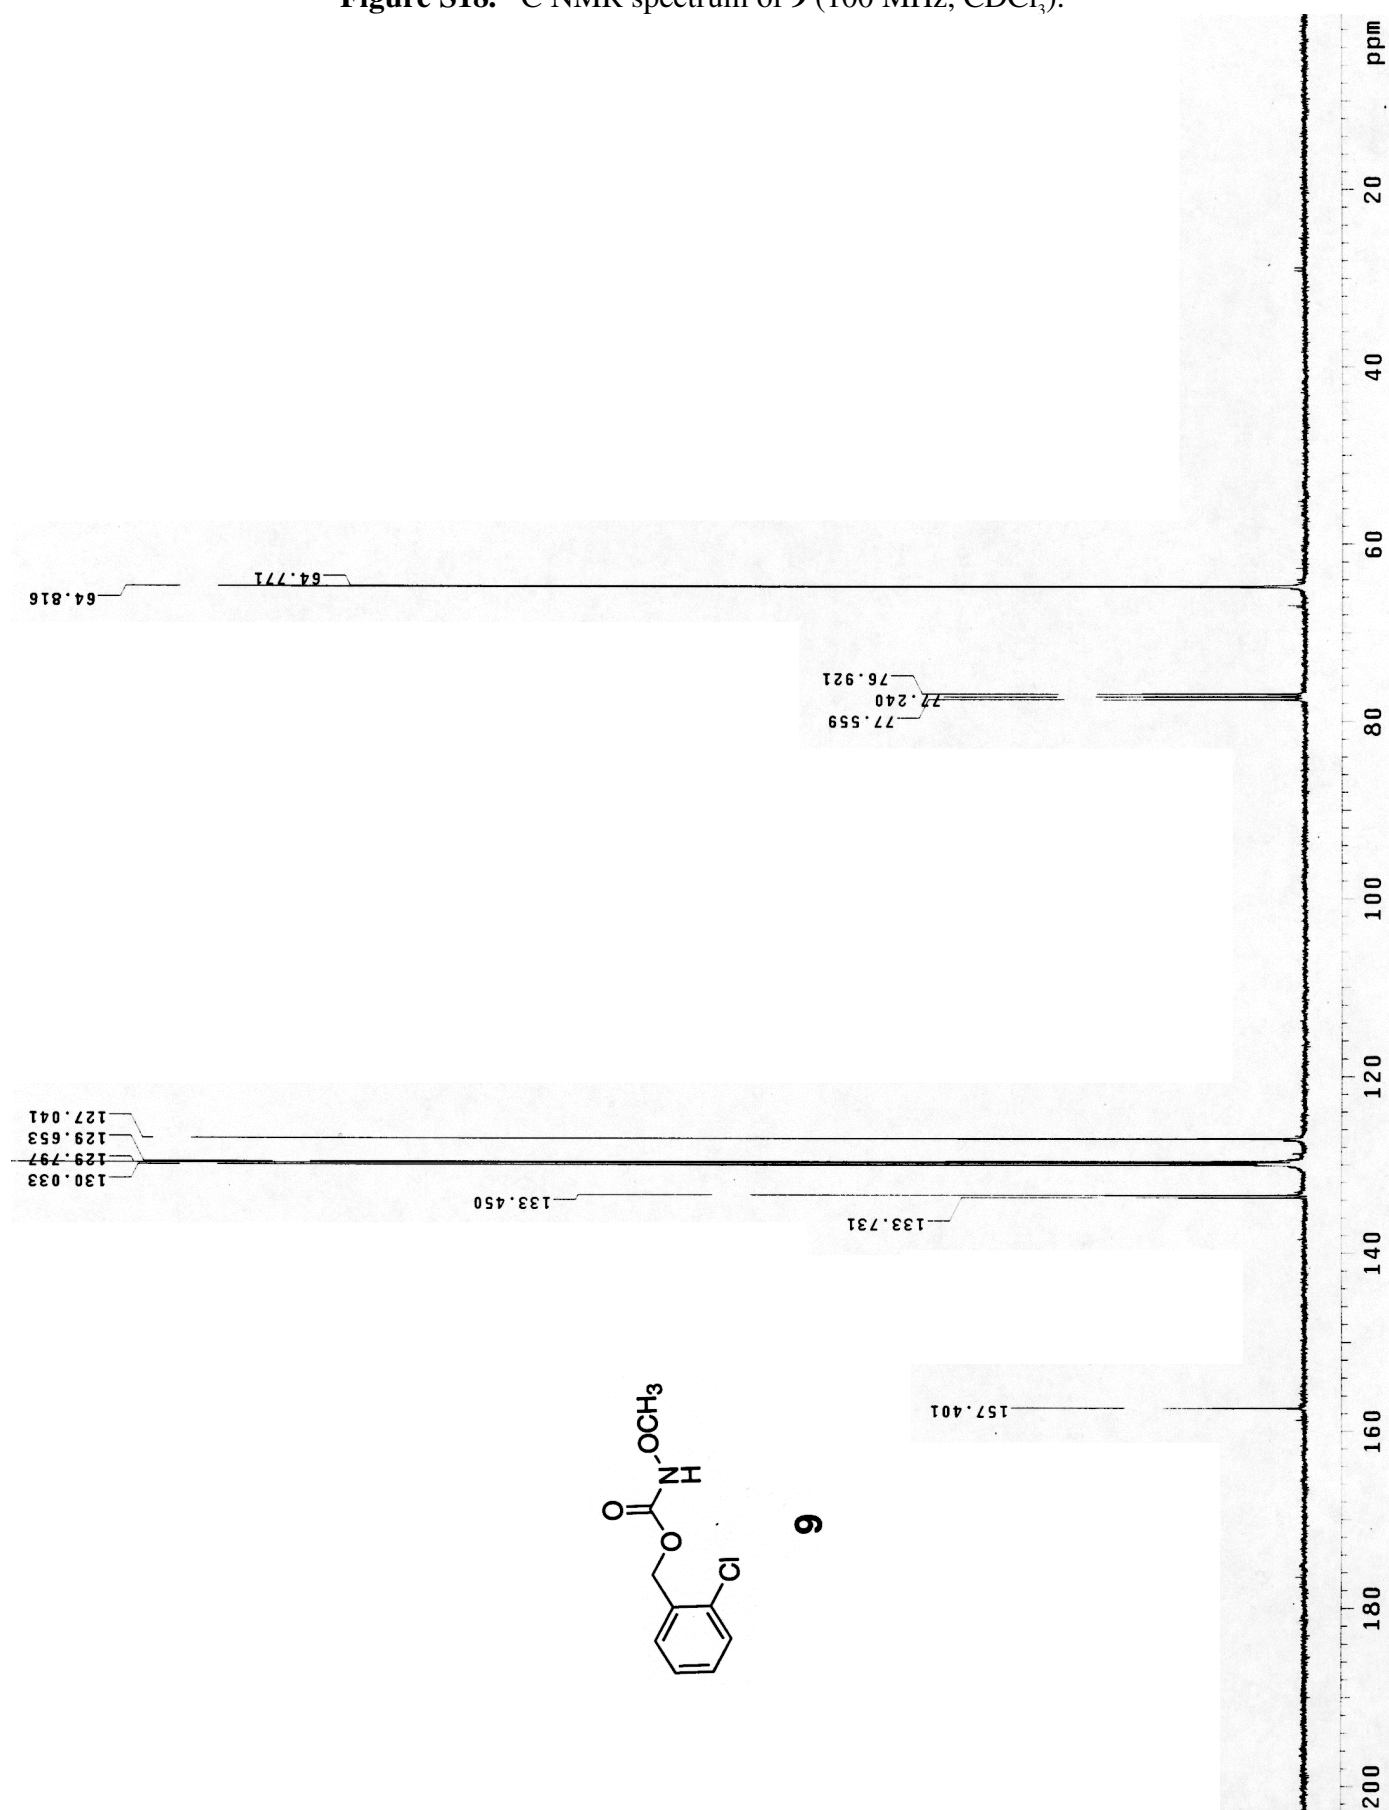

**Figure S19.** HPLC chromatograms of **14** and **18**

Kromasil C18 5 $\mu$ m 100Å, 5-20% B over 20 min, 1 mL/min

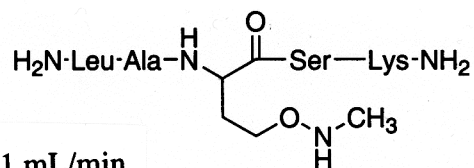

**14**

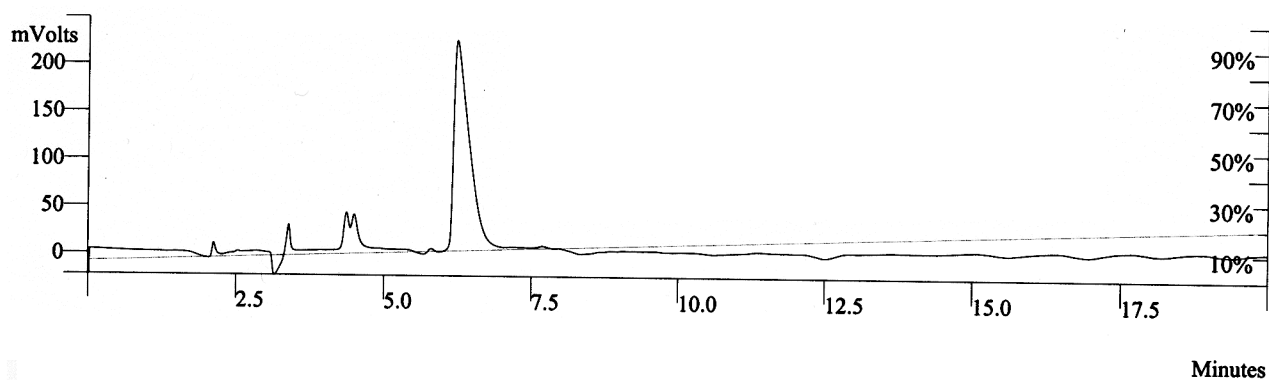

Kromasil C18 5 $\mu$ m 100Å, 5-20% B over 20 min, 1 mL/min

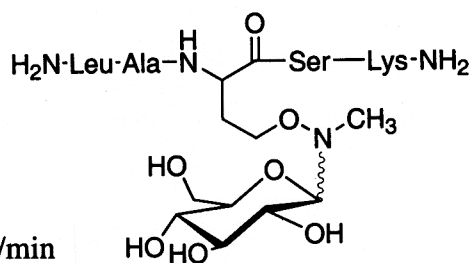

**18**

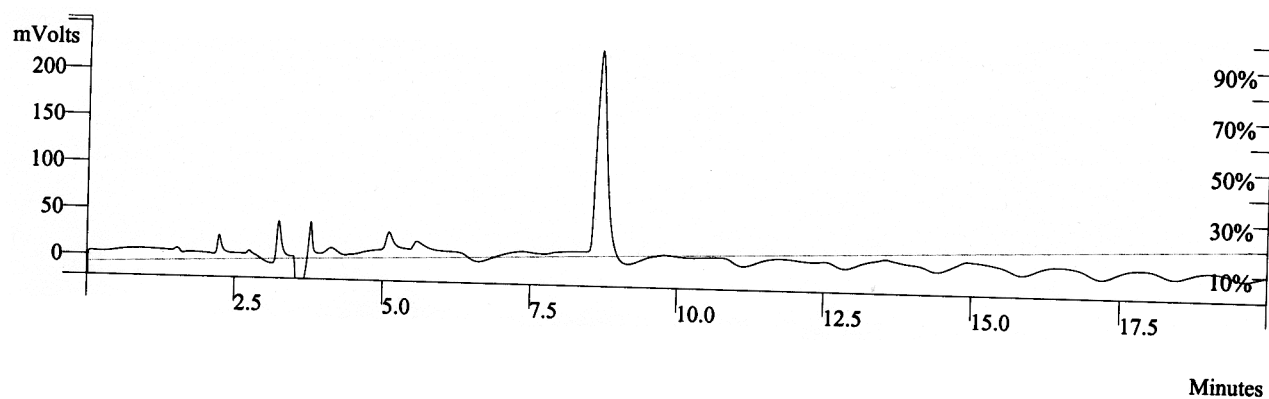

**Figure S20.** HPLC chromatograms of **15** and **19**

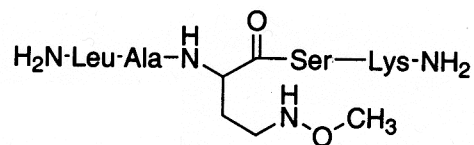

Kromasil C18 5 $\mu$ m 100Å, 5-20% B over 20 min, 1 mL/min

15

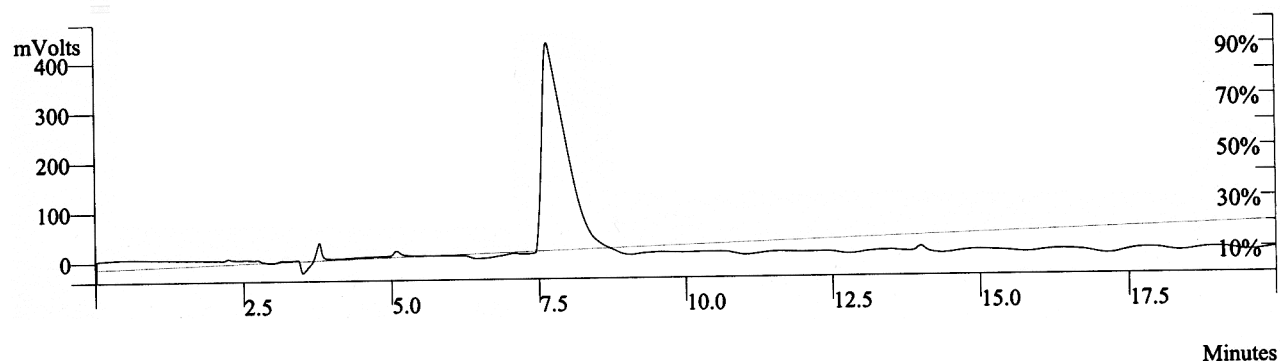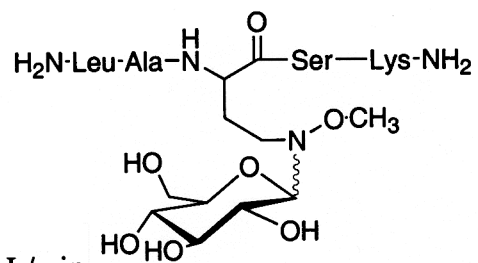

Kromasil C18 5 $\mu$ m 100Å, 5-20% B over 20 min, 1 mL/min

19

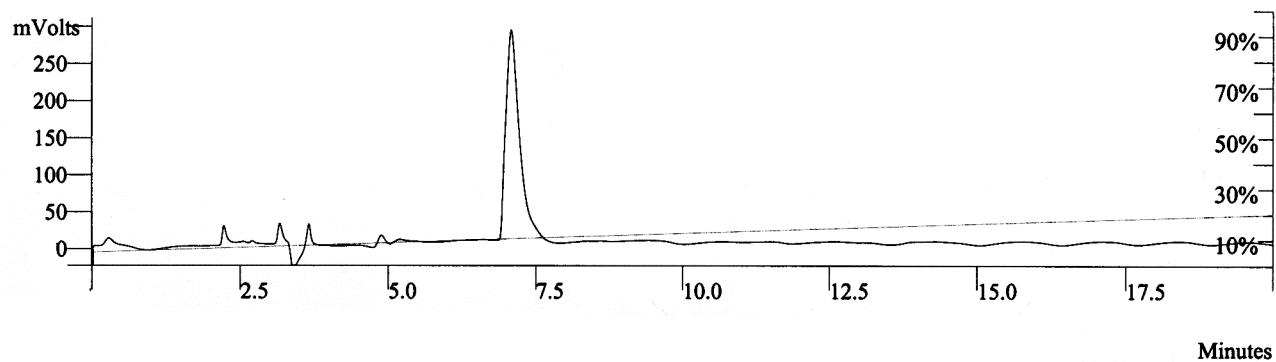

**Figure S21.** HPLC chromatograms of **16** and **20**

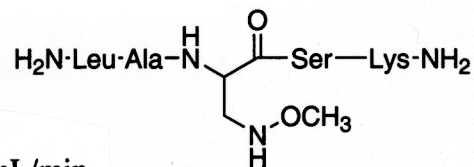

**16**

Microsorb C18 5 $\mu\text{m}$  100 $\text{\AA}$ , 0-20% B over 20 min, 1 mL/min

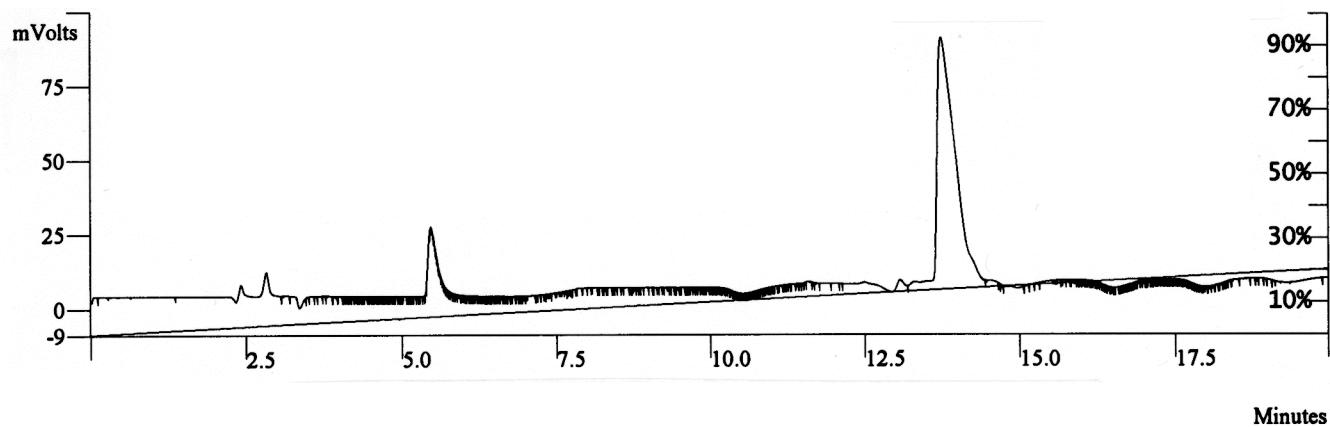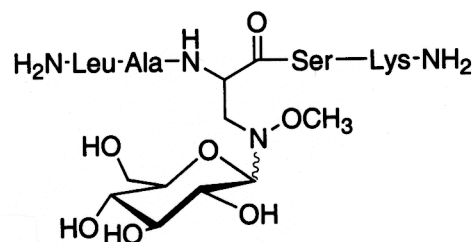

**20**

Kromasil C18 5 $\mu\text{m}$  100 $\text{\AA}$ , 5-20% B over 20 min, 1 mL/min

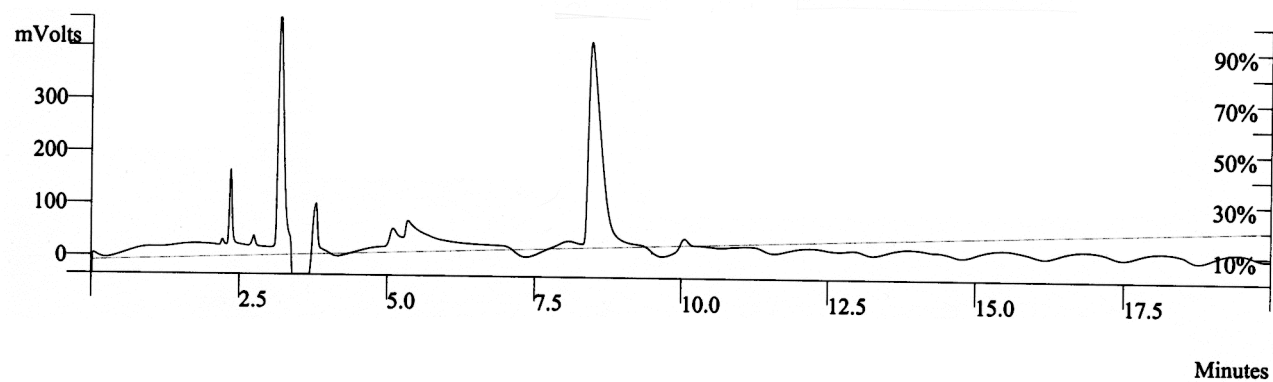

**Figure S22.** HPLC chromatogram of **17**

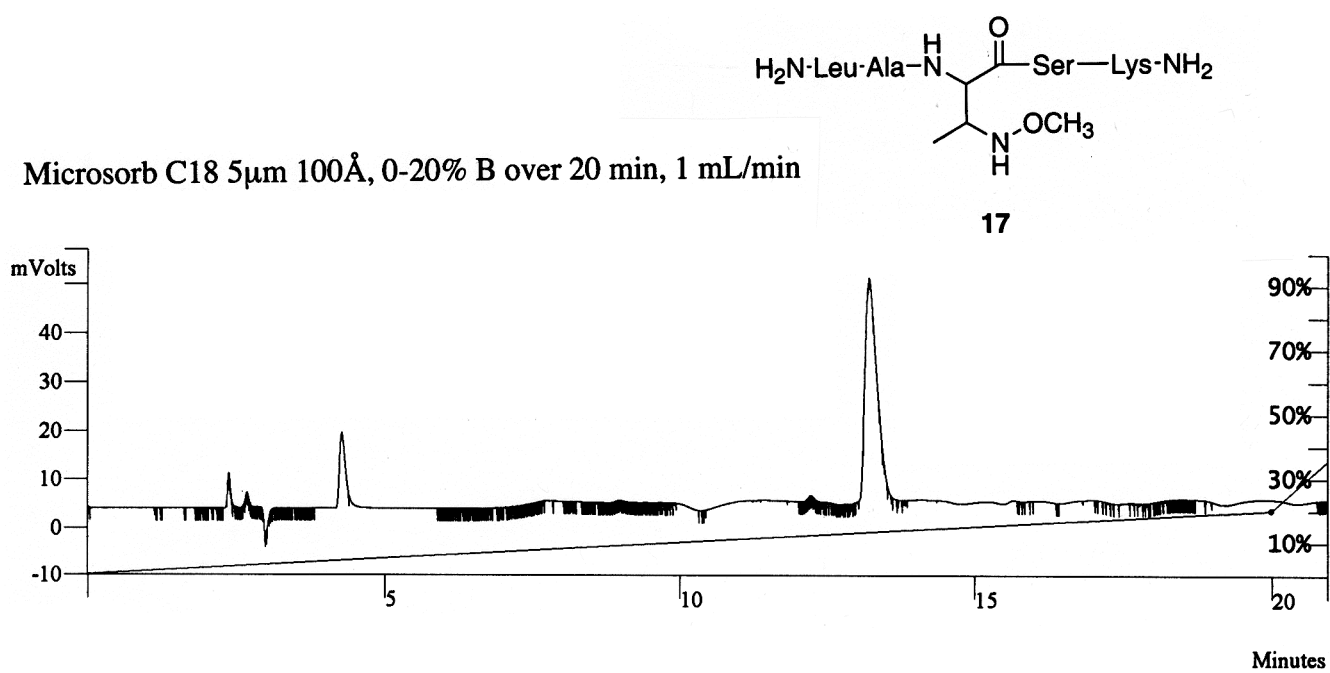

Supplement: Supplementary file 1 [file 5790939]
